# Supplementary material
Source: PubMed Central journal article supplement (PMC5510091)
Supplement: bi7b00429_si_001.pdf [file bi7b00429_si_001.pdf]

## SUPPORTING INFORMATION

# Halogen bonding: a powerful tool for modulation of peptide conformation.

Emma Danelius,<sup>†</sup> Hanna Andersson,<sup>†</sup> Patrik Jarvoll,<sup>†</sup> Kajsa Lood,<sup>†</sup> Jürgen Gräfenstein,<sup>†</sup> Máté Erdélyi<sup>†,‡,\*</sup>

<sup>†</sup>Department of Chemistry and Molecular Biology, University of Gothenburg, SE-41296 Gothenburg, Sweden

<sup>‡</sup>Swedish NMR Centre, Medicinaregatan 5, SE-41390 Gothenburg, Sweden

### Table of content

|     |                                                                |        |
|-----|----------------------------------------------------------------|--------|
| 1.  | Nomenclature and peptide numbering                             | p. S2  |
| 2.  | Synthesis                                                      | p. S4  |
| 2.1 | General information                                            | p. S4  |
| 2.2 | General procedure of peptide synthesis                         | p. S4  |
| 2.3 | Synthesis and purification protocols                           | p. S4  |
| 3.  | NMR spectroscopy                                               | p. S11 |
| 3.1 | <sup>1</sup> H Chemical shift assignments                      | p. S11 |
| 3.2 | <sup>15</sup> N Chemical shift assignments                     | p. S14 |
| 3.3 | J-couplings                                                    | p. S15 |
| 3.4 | NOE-buildup analysis                                           | p. S15 |
| 3.5 | VT-NMR (temperature coefficients)                              | p. S23 |
| 4.  | Computational conformational analysis                          | p. S26 |
| 5.  | Identification of solution ensemble using the NAMFIS algorithm | p. S27 |
| 6.  | DFT-Calculations                                               | p. S37 |
| 7.  | References                                                     | p. S43 |

## 1. Nomenclature and peptide numbering

The peptides included in this paper are shown in Figure S1. The synthesis, full characterization and conformational analysis of peptides **1a-b** and **2a-b** are provided in reference 1 and 2. The synthesis, full characterization and conformational analysis of peptides **3a-b**, **4a-b**, **5** and **8** are given below. The following amino acid abbreviations have been used in this supporting information: D-P= D-Proline, G=Glycine, A=Alanine, S=Serine, V=Valine, N=Asparagine, Q=Glutamine, S(Me)=*O*-methyl-serine, hS(Me)=*O*-methyl-homoserine, X=2-Aminobuty acid, A(Cl)=3-Chloroalanine, A(Br)=3-Bromoalanine. For side chain positions the following notations have been used: alpha ( $\alpha$ ), beta ( $\beta$ ), gamma ( $\gamma$ ), delta ( $\delta$ ) and epsilon ( $\epsilon$ ).

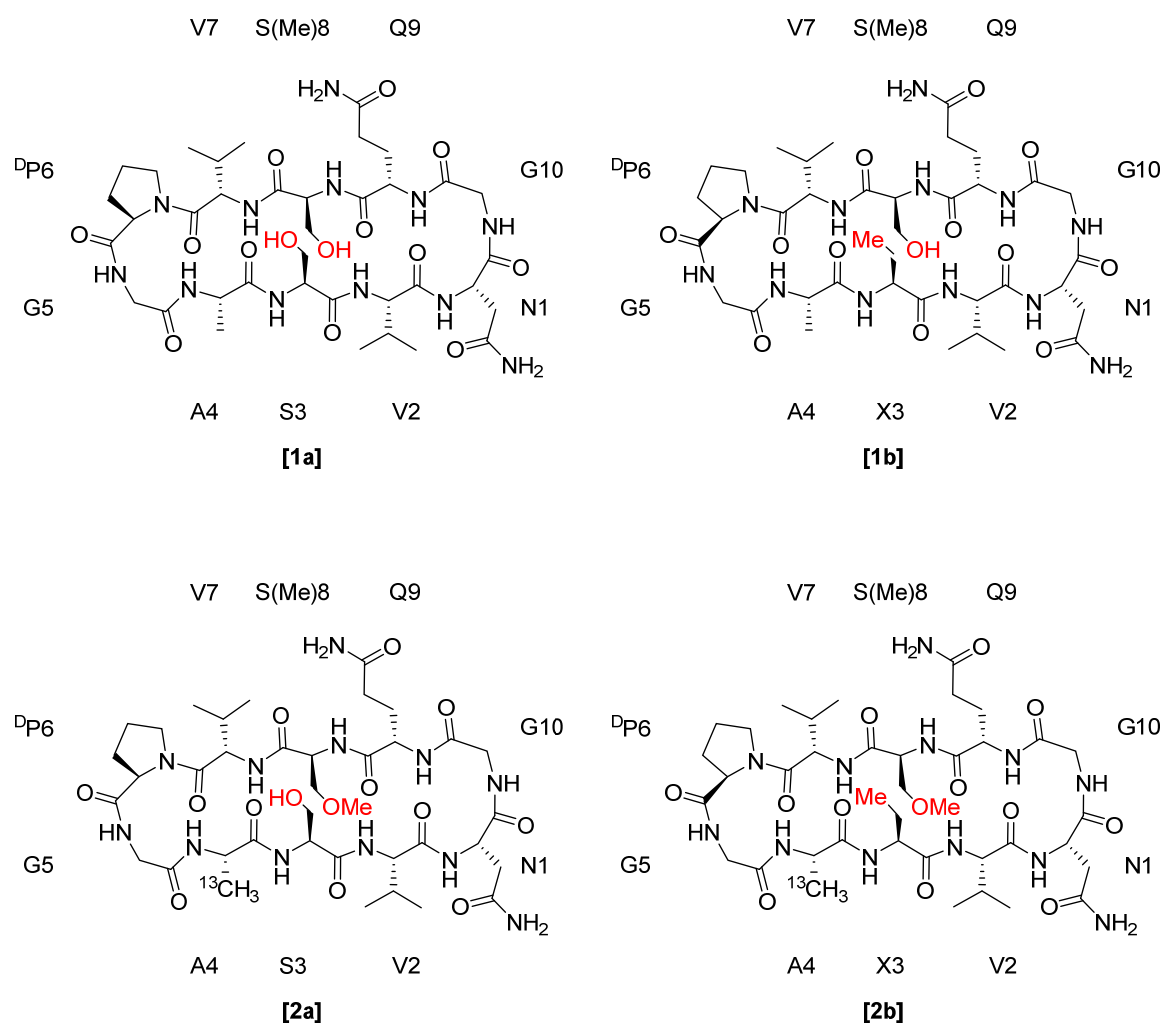

**Figure S1.** Structures of the included cyclic peptides, with the numbering used and the amino acids given as three letter acronyms. The synthesis and characterization of these peptides are previously reported.<sup>1,2</sup> *Figure S1 continued on p. S3.*

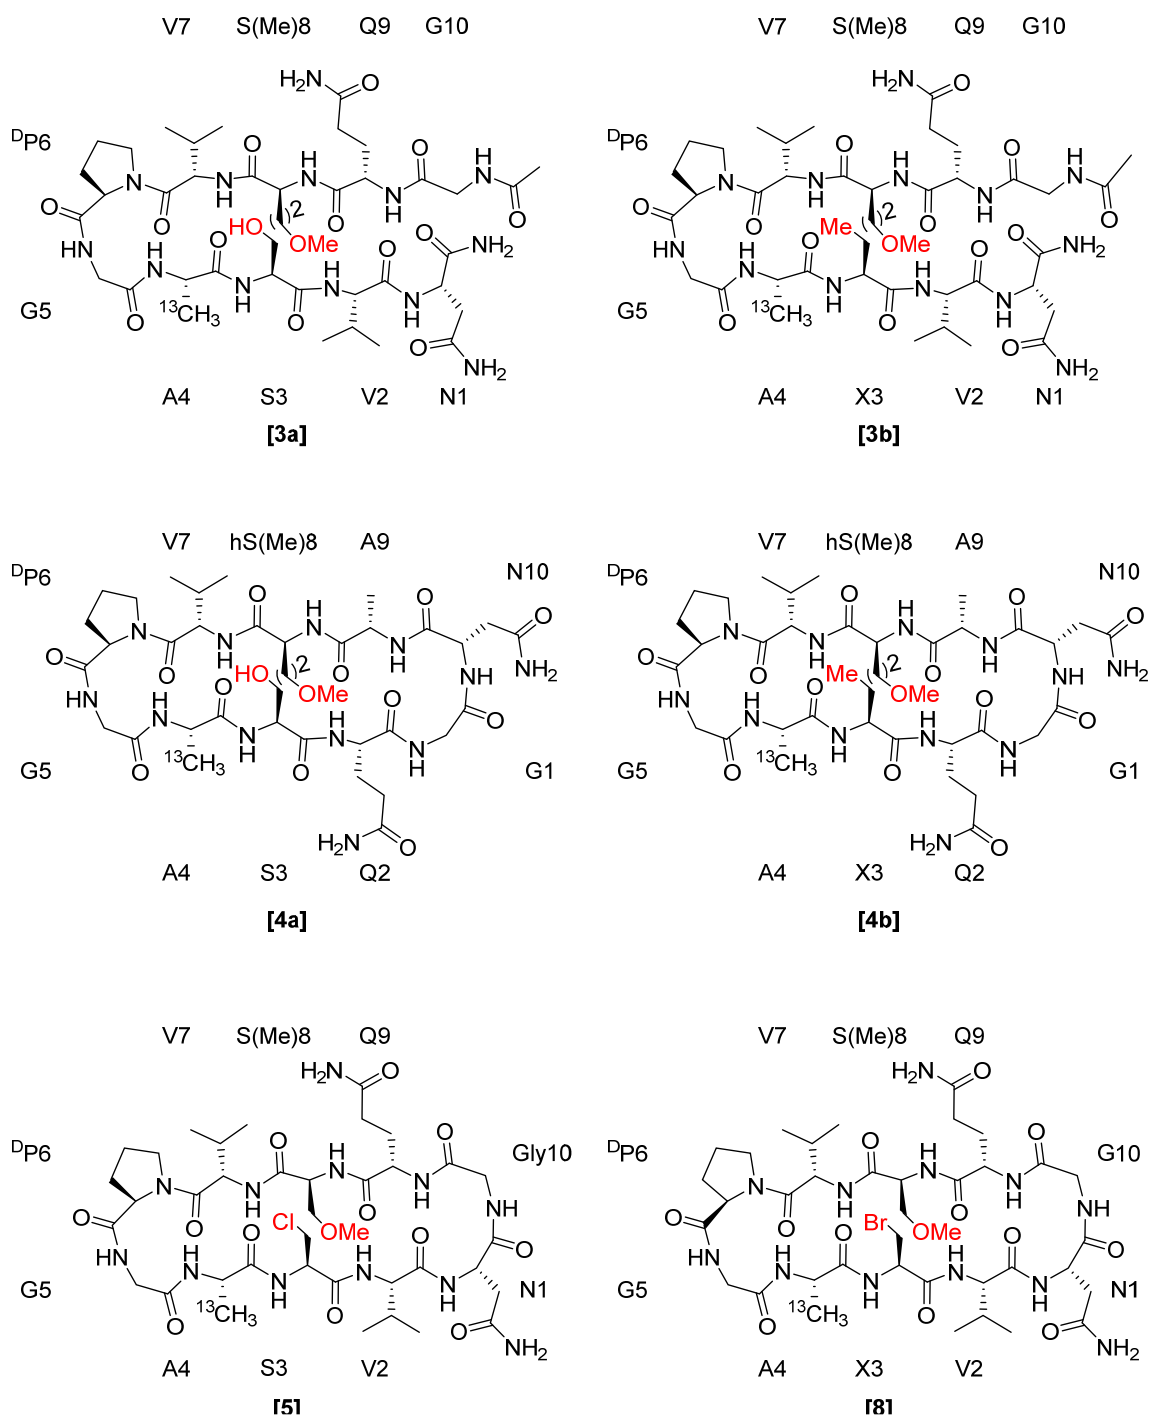

Continued Figure S1. Structures of the investigated cyclic peptides, with the numbering used and the amino acids given as three letter acronyms. The synthesis and characterization of these peptides are given below.

## 2. Peptide Synthesis

### 2.1 General information

The synthetic schemes for peptides **3a-b**, **4a-b**, **5** and **8** are outlined in scheme S1–4. Commercially available reagents and solvent were used without further purification. Asparagine substituted Rink MBHA resin (Fmoc-L-Asn(Trt)-Rink MBHA, loading 0.58 mmol/g), Fmoc-L-Ser(Me)-OH, Fmoc-L-Hse(Me)-OH and Fmoc-L-Ala(3-Cl)-OH were purchased from Iris Biotech. All other Fmoc-protected amino acids, glycine substituted 2-chlorotrityl resin (loading 0.46 mmol/g) and *O*-(benzotriazol-1-yl)-*N,N,N',N'*-tetramethyluronium tetrafluoroborate (TBTU) were purchased from AAPPtec. Dimethyl formamide (DMF, ACS reagent grade), piperidine (99%), *N,N*-Diisopropylethylamine (DIPEA), triisopropyl silane (TIPS), Fmoc-[3-<sup>13</sup>C]-Ala-OH, 1-[bis(dimethylamino)methylene]-1H-1,2,3-triazolo[4,5-b]pyridinium 3-oxid hexafluorophosphate (HATU), 2,4,6-trimethyl pyridine (TMP), and trifluoroacetic acid (TFA) were obtained from Sigma Aldrich. 3-(Trimethylammonium)propyl carbonate-functionalized silica gel (loading 0.46 mmol/g) was obtained from Sigma Aldrich/Silicycle inc. C<sub>18</sub> – cartridges were obtained from Isolute. Solid phase peptide synthesis was carried out using an automated benchtop PS3 Peptide Synthesizer from Protein Technologies. Analytical reversed phase liquid chromatography (RP-HPLC)–mass spectrometry (MS) was performed on a API SCIEX 150 EX Perkin Elmer ESI-MS (30 eV) connected to a Perkin Elmer gradient pump system and a C8 column (120 Å, 4 µm, 4.6 × 50 mm) using gradients of acetonitrile/water (CH<sub>3</sub>CN/H<sub>2</sub>O) with 1% formic acid (HCOOH) as mobile phase at a flow rate of 1 ml/min. Preparative RP-HPLC was performed on a VWR LaPrep system with single wavelength detection (220 nm), using a Gemini Phenomenex C<sub>18</sub> column (110 Å, 10 µm, 21.2 × 250 mm) and gradients of CH<sub>3</sub>CN/H<sub>2</sub>O (0.1% HCOOH) as mobile phase at a flow rate of 20 ml/min. High resolution LCMS analyses were performed on a Halo RP-Amide column (2.1 × 50 mm) with a flow of 250 µl/min and with a gradient of 5–95% ACN/MeOH 1:1 in H<sub>2</sub>O. TOF-MS was used with 1 scan/s and external calibration.

### 2.2 General procedure of peptide synthesis

The linear peptides were synthesized following the standard N $\alpha$ -Fmoc protecting group strategy<sup>3</sup> on a 300 or 400 µmol scale. *Tert*-butyl (Ser) and Trityl (Gln, Asn) were used as side chain protecting groups. Before the first coupling, the resin was swollen in DMF for 3 × 10 min. Coupling reactions were performed using TBTU (2 equiv.) and DIPEA (4 equiv.) in DMF (3 ml/coupling). All solvents were stored over 3 Å molecular sieves activated at 220 °C before use. Double couplings were used for the peptide coupling steps (2 × 60 min, except for the first coupling in the synthesis and coupling to D-Pro or Val for which 2 × 90 min was used). Two equivalents were used of all amino acids except for Fmoc-[3-<sup>13</sup>C]-Ala-OH of which 1.5 equivalents was used. Capping of unreacted sites was completed after each coupling with 20% acetic anhydride in DMF (5 ml) for 20 min. Fmoc-deprotection was accomplished by treatment with 20% piperidine in DMF (5 mL, 3 × 5 min).

### 2.3 Synthesis and purification protocols

**Synthesis of linear peptides 3a and 3b.** The linear peptides **3a** and **3b** were synthesized as described above using Fmoc-Asn(Trt)-Rink MBHA resin on 0.3 mmol scale (Scheme S1). After synthesis of the full peptide and removal of the final Fmoc-group, the resulted free amine was capped with 20% acetic anhydride in DMF (5 ml). The resin was transferred to a syringe fitted with a porous polypropylene frit and was washed several times with DCM. The peptide was then cleaved from the resin and the side chain protecting groups were removed by addition of TFA/TIPS/H<sub>2</sub>O (95:2.5:2.5, 10 mL). The syringe was put on a shaker for 2 h and the cleavage was monitored with LCMS analysis. The solution containing the cleaved peptide was filtered and the resin was washed with TFA followed by DCM. The combined filtrates

were concentrated under a stream of nitrogen gas and the peptide was precipitated from ice cooled diethyl ether (20–30 ml DEE/1 ml DCM). The resulting precipitate was filtered and washed with cold ether and the isolated crude was dried under vacuum. The crude peptides were stored at  $-18\text{ }^{\circ}\text{C}$ .

**Purification of linear peptides 3a and 3b by RP-HPLC.** **3a** was purified using a gradient of 5–55%  $\text{CH}_3\text{CN}$  in  $\text{H}_2\text{O}$  (0.1%  $\text{HCOOH}$ ) over 54 min at a flow rate of 20 ml/min and UV detection at  $\lambda = 220\text{ nm}$ . After evaporation **3a** was isolated as a white solid to a total yield of 34% over the full synthesis. MS  $m/z$   $[\text{M}+\text{H}]^+$  calculated for  $\text{C}_{40}^{13}\text{CH}_{69}\text{N}_{13}\text{O}_{15}$ : 985.51. Found: 985.5148. **3b** was purified using a gradient of 5–75%  $\text{CH}_3\text{CN}$  in  $\text{H}_2\text{O}$  (0.1%  $\text{HCOOH}$ ) over 50 min at a flow rate of 20 ml/min and UV detection at  $\lambda = 220\text{ nm}$ . After evaporation **3b** was isolated as a white solid to a total yield of 45% over the full synthesis. MS  $m/z$   $[\text{M}+\text{H}]^+$  calculated for  $\text{C}_{41}^{13}\text{CH}_{71}\text{N}_{13}\text{O}_{14}$ : 983.53. Found: 983.5355.

**Synthesis of linear peptides 11a and 11b.** The linear peptides were synthesized as described above using H-Gly-2-chlorotrityl resin on 0.3 mmol scale (Scheme S2). After synthesis of the full peptide and removal of the final Fmoc-group, the resin was transferred to a fritted column with a teflon T-bore stopcock and was washed several times with DCM. The linear peptide was cleaved from the resin by addition of 1% TFA in DCM. Nitrogen was gently bubbled through the mixture for approximately 5 min and the solution containing the cleaved peptide was then filtered into a vial containing 10% pyridine/MeOH. The procedure was repeated 6 times and the resin was then washed with several portions of DCM and MeOH. The combined filtrates were concentrated under a stream of nitrogen gas and the peptide was precipitated from water (20–30 ml water/1 ml DCM/MeOH solution). The resulting precipitate was filtered off and washed with water. The isolated crude peptide was dried under vacuum and was then stored at  $-18\text{ }^{\circ}\text{C}$ .

**Synthesis of cyclic peptides 4a and 4b.** Head-to-tail macrolactamization was performed in solution under pseudo-high dilution conditions.<sup>4</sup> The linear peptide precursor (**11a** or **11b**, 0.11 mmol) was dissolved in dry DMF (12 ml). Molecular sieves (3 Å) were added and the vial was flushed with nitrogen. HATU (3 equiv.) was dissolved in another portion of dry DMF (12 mL) under  $\text{N}_2$ . The two solutions were transferred to syringes and added dropwise, under  $\text{N}_2$ , into a round-bottomed flask containing HATU (0.1 equiv.), DMF (12 mL) and DIPEA (6 equiv.). The addition was performed at a rate of 10  $\mu\text{L}/\text{min}$  using a dual syringe-pump. After complete addition, the reaction mixture was stirred for another 15 min. LCMS analysis showed full conversion of the starting material. In order to remove 1-hydroxy-7-azabenzotriazole (HOAt) the reaction mixture was filtered through a plug of 3-(trimethylammonium)propyl carbonate-functionalized silica gel (1 g, 1.3 equiv. relative to HATU). The plug was rinsed with DMF until no product could be observed by LCMS in the filtrate. The DMF solution was then cooled on ice and slowly, while cooling, diluted with distilled water to a 1:1 mixture of DMF/water. The solution was then passed through a C18 cartridge (5 g, end-capped) conditioned with water. The column was run using a gradient of water in  $\text{CH}_3\text{CN}$  (50–0%) and the peptides were eluted with  $\text{CH}_3\text{CN}/\text{water}$  at 85:15. The solvent was removed under reduced pressure and the crude cyclic peptide was obtained as a white solid. For deprotection of amino acid side chains a mixture of TFA/ $\text{H}_2\text{O}$ /TIPS (95:2.5:2.5) was added to the crude peptide at  $0\text{ }^{\circ}\text{C}$ . The mixture was allowed to reach room temperature and was then stirred for two hours until LCMS showed full conversion of the starting material. The TFA was evaporated under nitrogen flush and cold ether was added to precipitate the product. The precipitate was filtered, washed with cold ether and dried under vacuum. The crude peptides were stored at  $-18\text{ }^{\circ}\text{C}$ .

**Purification of cyclic peptides 4a and 4b by RP-HPLC.** **4a** and **4b** were purified using a gradient of 5–55% CH<sub>3</sub>CN in H<sub>2</sub>O (0.1% HCOOH) over 54 min at a flow rate of 20 ml/min and UV detection at  $\lambda = 220$  nm. After evaporation **4a** was isolated as a white solid to a total yield of 6% over the full synthesis. MS m/z [M+H]<sup>+</sup> calculated for C<sub>36</sub><sup>13</sup>CH<sub>60</sub>N<sub>12</sub>O<sub>14</sub>: 898.44. Found: 898.4463. **4b** was isolated as a white solid to a total yield of 10% over the full synthesis. MS m/z [M+H]<sup>+</sup> calculated for C<sub>37</sub><sup>13</sup>CH<sub>62</sub>N<sub>12</sub>O<sub>13</sub>: 896.46. Found: 896.4671.

**Synthesis of linear peptide 7.** The linear peptide **6** was synthesized as described above using H-Gly-2-chlorotrityl resin on 0.4 mmol scale (Scheme S3). After removal of the final Fmoc-group, the resin was removed from the peptide synthesizer and transferred to a syringe fitted with a porous polypropylene frit and stopper, and several portions of DMF were added to wash the resin. The last two amino acids (Fmoc-Ala(3-Cl)-OH and Fmoc-[3-<sup>13</sup>C]-Ala-OH) were coupled manually (2 × 1 h) in DMF with HATU (2 equiv.) as coupling reagent and TMP (2 equiv.) as a base. With these conditions no trace of the  $\beta$ -eliminated peptide was observed by LC-MS/UV. Fmoc-deprotection was carried out with fast addition (1 min) of 20% piperidine (3 mL), giving product and  $\beta$ -eliminated byproduct in a 2:1 ratio. The coupling reactions were followed by LCMS and the Kaiser test was carried out to ensure complete coupling. After the final Fmoc-deprotection, the resin was washed with DCM and dried under a stream of nitrogen gas and then under vacuum. The resin was stored at -18 °C. In order to cleave the peptide from the solid support, the resin was swollen in DCM for 30 min followed by addition of 1% TFA in DCM. The solution was mixed by rotation on a tube rotator for 5 min and was then filtered into a vial containing 10% pyridine/MeOH. The procedure was repeated 6 times and the resin was then washed with several portions of DCM and MeOH. The combined filtrates were concentrated under a stream of nitrogen gas and the peptide was precipitated from water (20–30 ml water/1 ml DCM/MeOH solution). The crude peptide was filtered off and dried under vacuum.

**Synthesis of cyclic peptide 5.** Head-to-tail macrolactamization was performed in solution under pseudo-high dilution conditions.<sup>4</sup> The linear peptide precursor **7** (0.12 mmol) was dissolved in dry DMF (14 ml). Molecular sieves (3 Å) were added and the vial was flushed with nitrogen. HATU (3 equiv.) was dissolved in another portion of dry DMF (14 mL) under N<sub>2</sub>. The two solutions were transferred to syringes and added dropwise, under N<sub>2</sub>, into a round-bottomed flask containing HATU (0.1 equiv.), DMF (14 mL) and TMP (6 equiv.). The addition was carried out at a rate of 10  $\mu$ L/min using a dual syringe-pump. After complete addition, the reaction mixture was stirred for another 15 min. LCMS analysis showed full conversion of the starting material. The reaction mixture was then cooled on ice and slowly, while cooling, diluted with MQ-H<sub>2</sub>O to a 1:1 mixture of DMF/ H<sub>2</sub>O. The solution was then passed through a C18 cartridge (5 g, end-capped) conditioned with water. The column was run using a gradient of water in acetonitrile (70–0%) and the peptides were eluted with CH<sub>3</sub>CN/water at 85:15. The solvent was removed under reduced pressure and the crude cyclic peptide was obtained as a white solid. For deprotection of amino acid side chains a mixture of TFA/H<sub>2</sub>O/TIPS (95:2.5:2.5) was added to the crude peptide at 0 °C. The mixture was allowed to reach room temperature and was then stirred for 2.5 hours until LCMS showed full conversion of the starting material. The TFA was evaporated under nitrogen flush and cold ether was added to precipitate the product. The precipitate was filtered, washed with cold ether and dried under vacuum. The crude peptide was stored at -18 °C.

**Purification of cyclic peptide 5 by RP-HPLC.** Peptide **5** was purified using a gradient of 10–90% CH<sub>3</sub>CN in H<sub>2</sub>O (0.1% HCOOH) over 33 min at a flow rate of 20 ml/min and UV detection at  $\lambda = 220$  nm. After evaporation **5** was isolated as a colorless solid to a total yield of 18% over the full synthesis. MS m/z [M+H]<sup>+</sup> calculated for C<sub>37</sub><sup>13</sup>CH<sub>61</sub>CIN<sub>12</sub>O<sub>13</sub>: 930.42. Found: 930.42755.

**Synthesis of cyclic peptide 8.** Peptide **2a** (28.7 mg, 31.5  $\mu\text{mol}$ ) and sodium bromide (32.4 mg, 314.7  $\mu\text{mol}$ , dried at 150  $^{\circ}\text{C}$  overnight) were weighted into two separate vials. Molecular sieves (3  $\text{\AA}$ ) were added to both vials followed by anhydrous DMF (0.4 mL). The vials were capped under nitrogen and the solutions were agitated for 1 h using an orbital shaker. The Vilsmeier reagent was prepared by adding  $\text{PBr}_3$  to anhydrous DMF (0.5 mL) stirred in a 5 mL Biotage MW vial over molecular sieves (3  $\text{\AA}$ ) and under nitrogen atmosphere at 0  $^{\circ}\text{C}$ .<sup>5</sup> After 30 min the DMF solution of **2a**, followed by the DMF solution of sodium bromide, were added dropwise against the walls of the MW vial. The reaction mixture was stirred under nitrogen atmosphere covered with aluminum foil with the temperature slowly increasing from 0  $^{\circ}\text{C}$  to room temperature. After 5.5 days the reaction mixture was filtered and purified.

**Purification of cyclic peptide 8 by RP-HPLC.** Peptide **8** was purified using a gradient of 5–48%  $\text{CH}_3\text{CN}$  in  $\text{H}_2\text{O}$  (0.1%  $\text{HCOOH}$ ) over 35 min at a flow rate of 20 ml/min and UV detection at  $\lambda = 220$  nm. Selected fractions were analyzed using HPLC-MS/UV and those containing pure product were combined and lyophilized to obtain the product as a white solid (2.6 mg, 8.5%). MS ( $\text{ESI}^+$ )  $m/z$ : 975.9  $[\text{M} + \text{H}]^+$ , 977.6  $[\text{M} + 2 + \text{H}]^+$ .

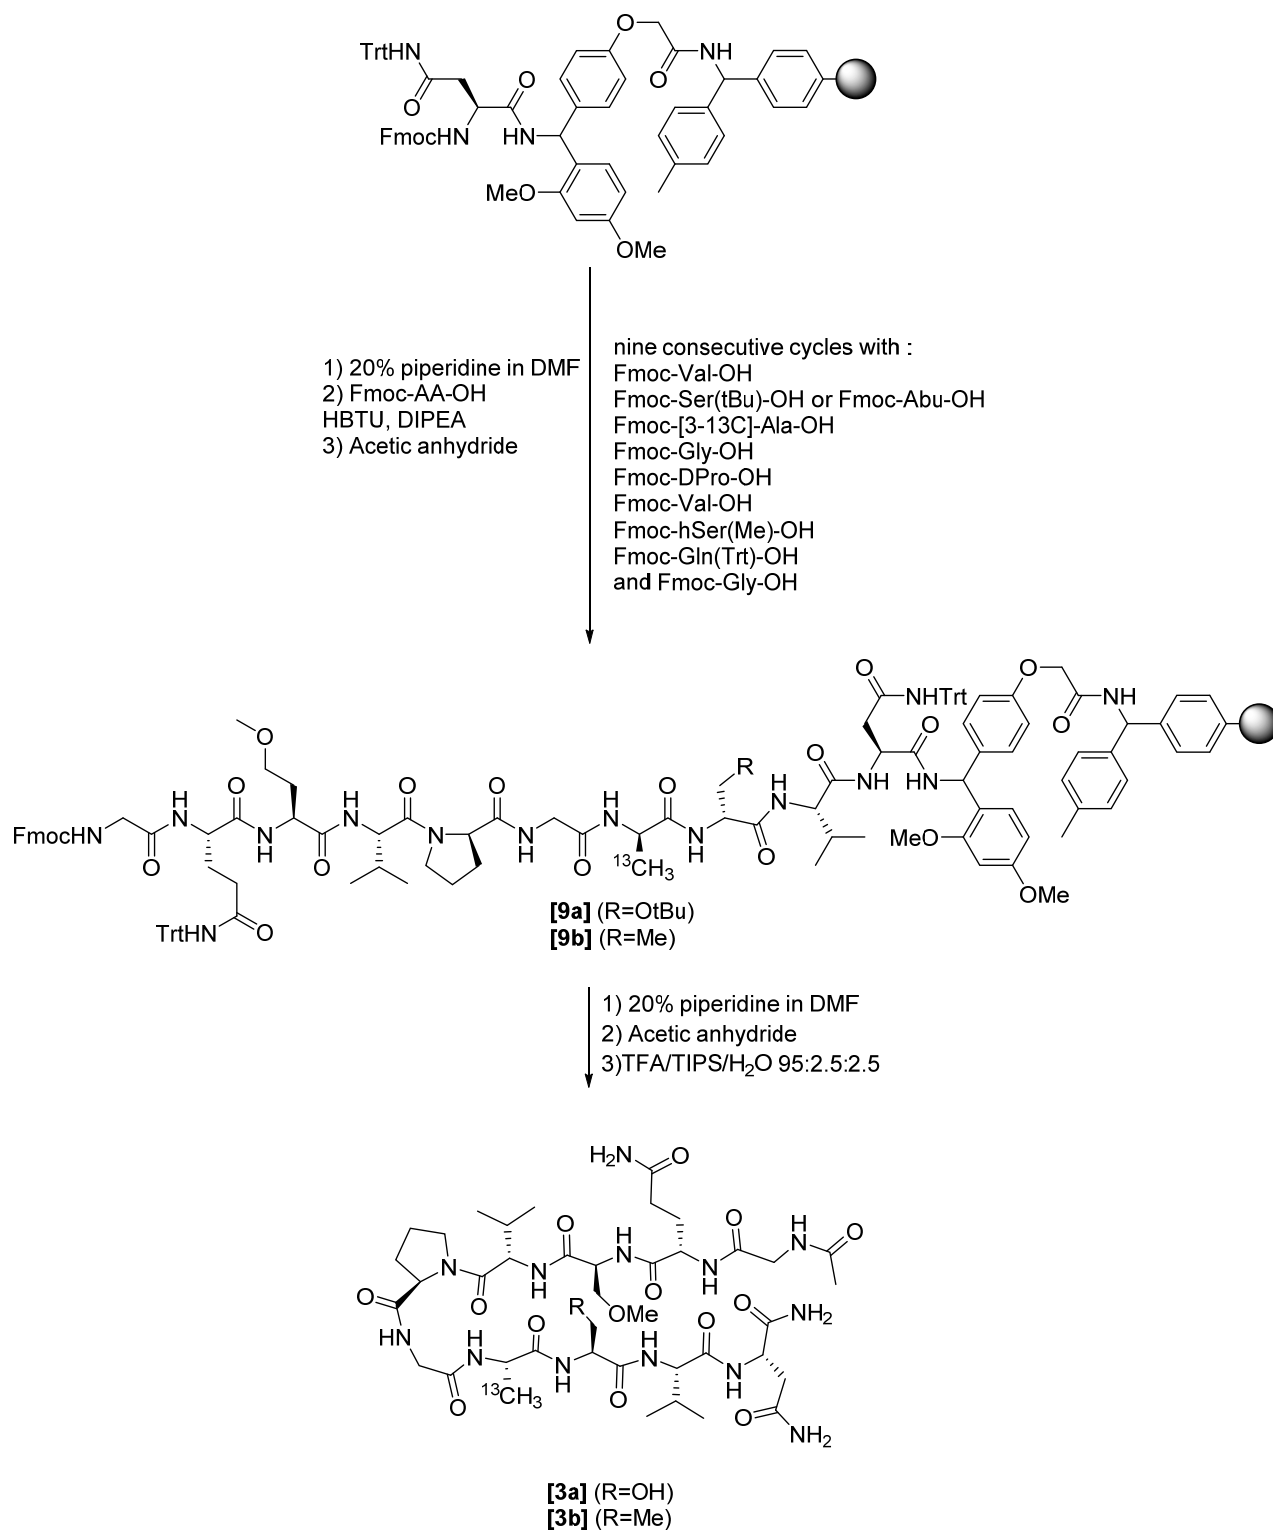

**Scheme S1.** Synthesis of the linear Peptides **3a** (R=OH) and **3b** (R=Me).



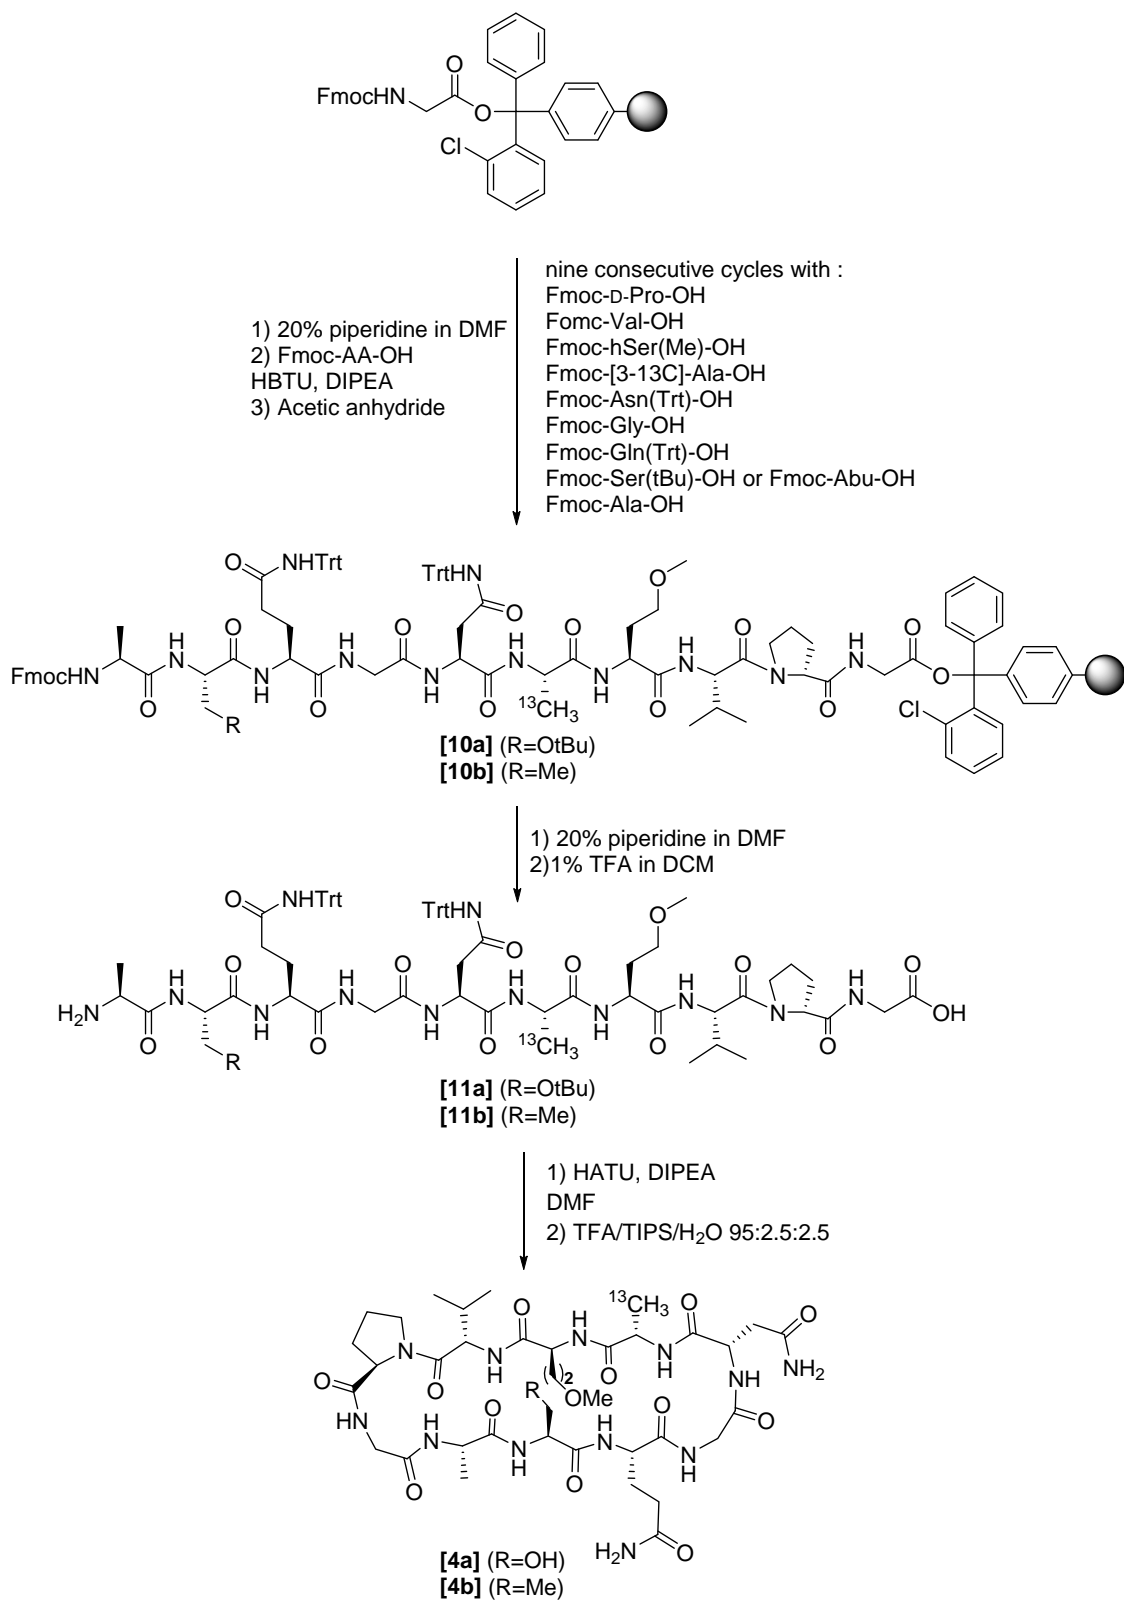

**Scheme S2.** Synthesis of the cyclic peptides **4a** (R=OH) and **4b** (R=Me).

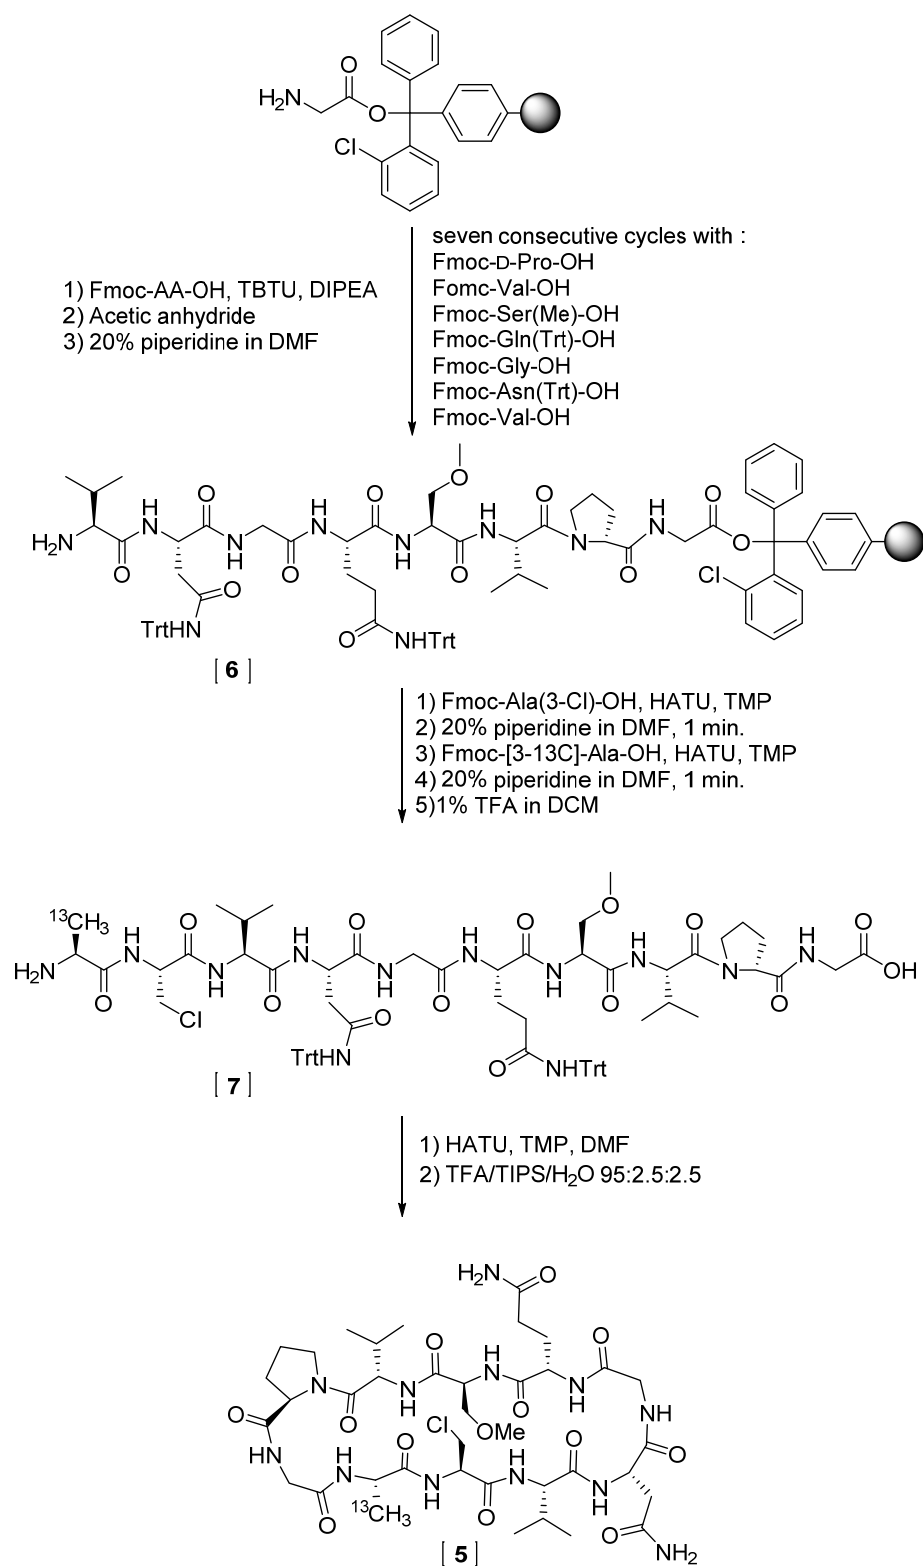

**Scheme S3.** Synthesis of the chloro-substituted peptide **5**.

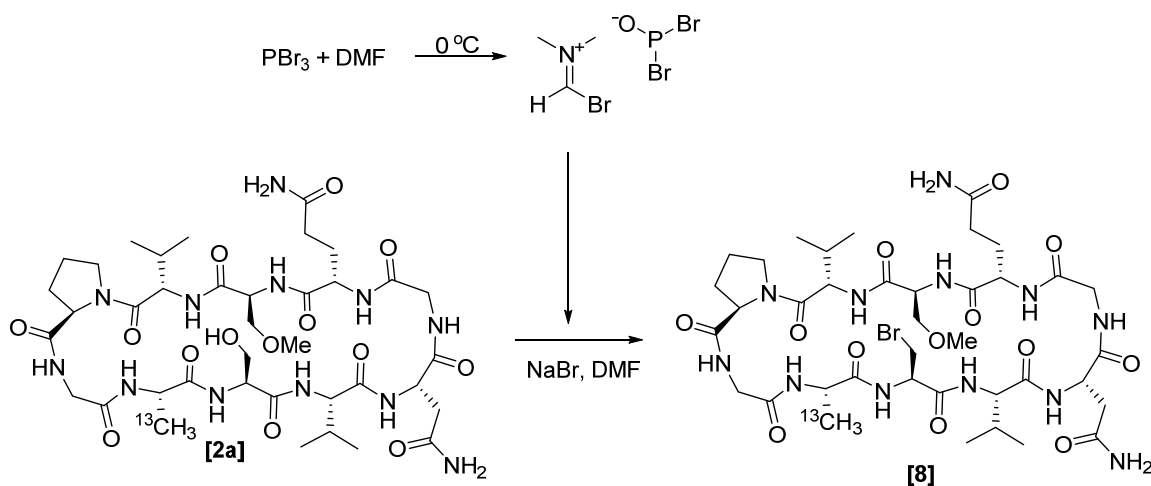

**Scheme S4.** Synthesis of the bromo-substituted peptide **8**.

### 3. NMR spectroscopy

Assignment of protons for all peptides except peptide **8** were derived from TOCSY and NOESY NMR spectra recorded at 25 °C on a 900 MHz BRUKER Avance III HD NMR spectrometer equipped with a TCI cryoprobe in DMSO-*d*<sub>6</sub>. Assignment of protons for peptide **8** were derived from TOCSY and NOESY NMR spectra recorded at -10 °C on a 800 MHz BRUKER Avance III HD NMR spectrometer equipped with a TXO cryoprobe in DMF-*d*<sub>7</sub>. The chemical shifts are shown in Tables S1–S6. <sup>3</sup>J<sub>CH $\alpha$ -NH</sub> coupling constants were determined from <sup>1</sup>H NMR spectra measured on a 400 MHz Varian spectrometer using DMSO-*d*<sub>6</sub> as solvent. The coupling constants are given in Table S8.

#### 3.1 <sup>1</sup>H Chemical shift assignments

**Table S1.** <sup>1</sup>H NMR chemical shift assignment ( $\delta$ , ppm) for **3a** at 25 °C in DMSO-*d*<sub>6</sub>.

| Residue    | H $\alpha$ | H $\alpha$ 1 | H $\alpha$ 2 | H $\beta$ | H $\beta$ 1 | H $\beta$ 2 | H $\gamma$ | H $\gamma$ 1 | H $\gamma$ 2 | H $\delta$ 1 | H $\delta$ 2 | H $\epsilon$ 1 | H $\epsilon$ 2 | HN   |
|------------|------------|--------------|--------------|-----------|-------------|-------------|------------|--------------|--------------|--------------|--------------|----------------|----------------|------|
| <b>N1</b>  | 4.45       |              |              |           | 2.52        | 2.37        |            |              |              | 6.88         | 7.27         |                |                | 7.98 |
| <b>V2</b>  | 4.11       |              |              | 2.02      |             |             |            | 0.86         | 0.82         |              |              |                |                | 7.78 |
| <b>S3</b>  | 4.40       |              |              |           | 3.62        | 3.57        |            |              |              |              |              |                |                | 8.12 |
| <b>A4</b>  | 4.38       |              |              |           | 1.29        | 1.14        |            |              |              |              |              |                |                | 7.88 |
| <b>G5</b>  |            | 3.67         | 3.63         |           |             |             |            |              |              |              |              |                |                | 7.99 |
| <b>P6</b>  | 4.28       |              |              | 2.04      |             |             |            | 1.86         | 1.75         | 3.71         | 3.54         |                |                |      |
| <b>V7</b>  | 4.32       |              |              | 1.95      |             |             | 0.85       |              |              |              |              |                |                | 7.95 |
| <b>hS8</b> | 4.38       |              |              |           | 1.72        | 1.89        | 3.28       |              |              |              |              |                |                | 8.09 |
| <b>Q9</b>  | 4.24       |              |              |           | 1.86        | 1.70        | 2.07       |              |              |              |              | 7.23           | 6.74           | 8.09 |
| <b>G10</b> |            | 3.69         | 3.29         |           |             |             |            |              |              |              |              |                |                | 8.09 |

**Table S2.** <sup>1</sup>H NMR chemical shift assignment (δ, ppm) for **3b** at 25 °C in DMSO-*d*<sub>6</sub>.

| Residue    | H $\alpha$ | H $\alpha$ 1 | H $\alpha$ 2 | H $\beta$ | H $\beta$ 1 | H $\beta$ 2 | H $\gamma$ | H $\gamma$ 1 | H $\gamma$ 2 | H $\delta$ 1 | H $\delta$ 2 | H $\epsilon$ 1 | H $\epsilon$ 2 | HN   |
|------------|------------|--------------|--------------|-----------|-------------|-------------|------------|--------------|--------------|--------------|--------------|----------------|----------------|------|
| <b>N1</b>  | 4.44       |              |              | 2.42      | 2.49        |             |            |              |              | 7.03         | 6.88         |                |                | 8.05 |
| <b>V2</b>  | 4.13       |              |              | 1.97      | 0.82        |             |            |              |              |              |              |                |                | 7.78 |
| <b>X3</b>  | 4.28       |              |              | 1.51      |             |             | 0.82       |              |              |              |              |                |                | 8.11 |
| <b>A4</b>  | 4.38       |              |              |           | 1.28        | 1.14        |            |              |              |              |              |                |                | 7.84 |
| <b>G5</b>  |            | 3.67         | 3.61         |           |             |             |            |              |              |              |              |                |                | 8.04 |
| <b>P6</b>  | 4.28       |              |              | 2.04      |             |             |            | 1.85         | 1.77         | 3.68         | 3.55         |                |                |      |
| <b>V7</b>  | 4.33       |              |              | 1.94      |             |             |            | 0.85         | 0.84         |              |              |                |                | 8.02 |
| <b>hS8</b> | 4.44       |              |              |           | 1.89        | 1.72        | 3.28       |              |              |              |              |                |                | 8.15 |
| <b>Q9</b>  | 4.28       |              |              |           | 1.85        | 1.69        | 2.06       |              |              |              |              | 7.23           | 6.74           | 8.09 |
| <b>G10</b> | 3.69       |              |              |           |             |             |            |              |              |              |              |                |                | 8.08 |

**Table S3.** <sup>1</sup>H NMR chemical shift assignment (δ, ppm) for **4a** at 25 °C in DMSO-*d*<sub>6</sub>.

| Residue    | H $\alpha$ | H $\alpha$ 1 | H $\alpha$ 2 | H $\beta$ | H $\beta$ 1 | H $\beta$ 2 | H $\gamma$ | H $\gamma$ 1 | H $\gamma$ 2 | H $\delta$ 1 | H $\delta$ 2 | H $\epsilon$ 1 | H $\epsilon$ 2 | HN   |
|------------|------------|--------------|--------------|-----------|-------------|-------------|------------|--------------|--------------|--------------|--------------|----------------|----------------|------|
| <b>G1</b>  |            | 3.90         | 3.33         |           |             |             |            |              |              |              |              |                |                | 8.71 |
| <b>Q2</b>  | 4.30       |              |              |           | 1.88        | 1.76        | 2.00       |              |              |              |              | 7.15           | 6.71           | 8.12 |
| <b>S3</b>  | 4.59       |              |              |           | 3.62        | 3.55        |            |              |              |              |              |                |                | 8.29 |
| <b>A4</b>  | 4.57       |              |              | 1.26      |             |             |            |              |              |              |              |                |                | 7.80 |
| <b>G5</b>  |            | 3.77         | 3.52         |           |             |             |            |              |              |              |              |                |                | 8.44 |
| <b>P6</b>  | 4.28       |              |              | 2.05      |             |             | 1.86       |              |              | 3.57         |              |                |                |      |
| <b>V7</b>  | 4.37       |              |              | 1.91      |             |             |            | 0.83         | 0.78         |              |              |                |                | 8.25 |
| <b>hS8</b> | 4.62       |              |              |           | 1.94        | 1.68        | 3.26       |              |              |              |              |                |                | 8.49 |
| <b>A9</b>  | 4.42       |              |              |           | 1.27        | 1.14        |            |              |              |              |              |                |                | 7.70 |
| <b>N10</b> | 4.52       |              |              |           | 2.63        | 2.48        |            |              |              | 7.35         | 6.90         |                |                | 8.22 |

**Table S4.**  $^1\text{H}$  NMR chemical shift assignment ( $\delta$ , ppm) for **4b** at 25 °C in DMSO- $d_6$ .

| Residue    | H $\alpha$ | H $\alpha$ 1 | H $\alpha$ 2 | H $\beta$ | H $\beta$ 1 | H $\beta$ 2 | H $\gamma$ | H $\gamma$ 1 | H $\gamma$ 2 | H $\delta$ 1 | H $\delta$ 2 | H $\epsilon$ 1 | H $\epsilon$ 2 | HN   |
|------------|------------|--------------|--------------|-----------|-------------|-------------|------------|--------------|--------------|--------------|--------------|----------------|----------------|------|
| <b>G1</b>  |            | 3.80         | 3.32         |           |             |             |            |              |              |              |              |                |                | 8.90 |
| <b>Q2</b>  | 4.32       |              |              |           | 1.77        | 1.71        | 1.95       |              |              |              |              | 7.17           | 6.71           | 8.14 |
| <b>X3</b>  | 4.65       |              |              |           | 1.63        | 1.48        | 0.80       |              |              |              |              |                |                | 8.38 |
| <b>A4</b>  | 4.61       |              |              | 1.26      |             |             |            |              |              |              |              |                |                | 7.74 |
| <b>G5</b>  |            | 3.78         | 3.45         |           |             |             |            |              |              |              |              |                |                | 8.47 |
| <b>P6</b>  | 4.27       |              |              | 2.06      |             |             | 1.86       |              |              | 3.62         | 3.56         |                |                |      |
| <b>V7</b>  | 4.38       |              |              | 1.90      |             |             |            | 0.82         | 0.78         |              |              |                |                | 8.40 |
| <b>hS8</b> | 4.73       |              |              |           | 1.93        | 1.65        | 3.26       |              |              |              |              |                |                | 8.49 |
| <b>A9</b>  | 4.52       |              |              |           | 1.29        | 1.15        |            |              |              |              |              |                |                | 7.73 |
| <b>N10</b> | 4.54       |              |              |           | 2.63        | 2.43        |            |              |              | 7.30         | 6.85         |                |                | 8.38 |

**Table S5.**  $^1\text{H}$  NMR chemical shift assignment ( $\delta$ , ppm) for **5** at 25 °C in DMSO- $d_6$ .

| Residue       | H $\alpha$ | H $\alpha$ 1 | H $\alpha$ 2 | H $\beta$ | H $\beta$ 1 | H $\beta$ 2 | H $\gamma$ | H $\gamma$ 1 | H $\gamma$ 2 | H $\delta$ 1 | H $\delta$ 2 | H $\epsilon$ 1 | H $\epsilon$ 2 | HN   |
|---------------|------------|--------------|--------------|-----------|-------------|-------------|------------|--------------|--------------|--------------|--------------|----------------|----------------|------|
| <b>N1</b>     | 4.07       |              |              | 2.91      | 2.43        |             |            |              |              | 7.38         | 6.82         |                |                | 9.32 |
| <b>V2</b>     | 4.19       |              |              | 1.82      |             |             |            | 0.82         | 0.78         |              |              |                |                | 8.60 |
| <b>A(Cl)3</b> | 5.25       |              |              |           | 3.70        | 3.48        |            |              |              |              |              |                |                | 8.75 |
| <b>A4</b>     | 4.66       |              |              |           | 1.31        | 1.15        |            |              |              |              |              |                |                | 7.67 |
| <b>G5</b>     |            | 3.84         | 3.39         |           |             |             |            |              |              |              |              |                |                | 8.61 |
| <b>P6</b>     | 4.29       |              |              | 2.03      |             |             | 1.84       |              |              | 3.56         | 3.48         |                |                |      |
| <b>V7</b>     | 4.30       |              |              | 1.89      |             |             |            | 0.81         | 0.76         |              |              |                |                | 8.51 |
| <b>S(Me)8</b> | 4.80       |              |              |           | 3.55        | 3.44        |            |              |              |              |              |                |                | 8.78 |
| <b>Q9</b>     | 4.53       |              |              |           | 1.84        | 1.71        | 2.04       |              |              |              |              | 7.04           | 6.72           | 7.57 |
| <b>G10</b>    |            | 3.84         | 3.25         |           |             |             |            |              |              |              |              |                |                | 8.18 |

**Table S6.** <sup>1</sup>H NMR chemical shift assignment (δ, ppm) for **8** at -10 °C in DMF-*d*<sub>7</sub>.

| Residue       | H $\alpha$ | H $\alpha$ 1 | H $\alpha$ 2 | H $\beta$ | H $\beta$ 1 | H $\beta$ 2 | H $\gamma$ | H $\gamma$ 1 | H $\gamma$ 2 | H $\delta$ 1 | H $\delta$ 2 | H $\epsilon$ 1 | H $\epsilon$ 2 | HN   |
|---------------|------------|--------------|--------------|-----------|-------------|-------------|------------|--------------|--------------|--------------|--------------|----------------|----------------|------|
| <b>N1</b>     | 4.55       |              |              |           | 3.24        | 3.16        |            |              |              |              |              |                |                | 9.73 |
| <b>V2</b>     | 4.38       |              |              | 2.09      |             |             | 0.98       |              |              |              |              |                |                | 7.99 |
| <b>A(Br)3</b> | 4.67       |              |              | 3.92      |             |             |            |              |              |              |              |                |                | 8.33 |
| <b>A4</b>     | 4.22       |              |              |           | 1.35        | 1.20        |            |              |              |              |              |                |                |      |
| <b>G5</b>     |            | 3.71         | 3.58         |           |             |             |            |              |              |              |              |                |                | 8.78 |
| <b>P6</b>     | 4.67       |              |              | 2.50      |             |             |            | 2.10         | 2.03         | 3.91         |              |                |                |      |
| <b>V7</b>     | 4.50       |              |              | 1.98      |             |             | 0.89       |              |              |              |              |                |                | 7.72 |
| <b>hS8</b>    | 4.69       |              |              |           | 3.72        | 3.58        |            |              |              |              |              |                |                | 8.76 |
| <b>Q9</b>     | 4.69       |              |              | 2.05      |             |             | 2.50       |              |              |              |              |                |                | 7.58 |
| <b>G10</b>    |            | 3.93         | 3.56         |           |             |             |            |              |              |              |              |                |                | 8.82 |

<sup>15</sup>N Chemical shift assignments**Table S7.** <sup>15</sup>N Chemical shift assignments (δ, ppm) at 25 °C in DMSO-*d*<sub>6</sub>.

|           | <sup>15</sup> N chemical shift |           |             |           |           |           |                |           |            |  |
|-----------|--------------------------------|-----------|-------------|-----------|-----------|-----------|----------------|-----------|------------|--|
|           | <b>N1</b>                      | <b>V2</b> | <b>S/X3</b> | <b>A4</b> | <b>G5</b> | <b>V7</b> | <b>hS(Me)8</b> | <b>Q9</b> | <b>G10</b> |  |
| <b>3a</b> | 120.1                          | 117.2     | 114.6       | 120.6     | 106.1     | 119.4     | 119.7          | 118.4     | 111.3      |  |
| <b>3b</b> | 120.9                          | 116.2     | 119.4       | 120.6     | 106.3     | 119.5     | 120.1          | 118.1     | 111.9      |  |
|           | <b>G1</b>                      | <b>Q2</b> | <b>S/X3</b> | <b>A4</b> | <b>G5</b> | <b>V7</b> | <b>hS(Me)8</b> | <b>A9</b> | <b>N10</b> |  |
| <b>4a</b> | 112.9                          | 120.9     | 116.6       | 120.6     | 109.0     | 120.7     | 121.1          | 119.5     | 120.6      |  |
| <b>4b</b> | 115.3                          | 121.3     | 121.3       | 120.5     | 109.3     | 120.5     | 121.3          | 119.2     | 122.4      |  |

*J-couplings***Table S8.**  $^3J_{\text{CH}\alpha,\text{NH}}$  for Peptides **3a-b**, **4a-b** and **5**.

| Residue position | $^3J_{\text{CH}\alpha,\text{NH}}$ |      |      |      |      |
|------------------|-----------------------------------|------|------|------|------|
|                  | 3a                                | 3b   | 4a   | 4b   | 5    |
| 1                | 7.94                              |      |      |      | 6.75 |
| 2                | 5.55                              | 5.98 | 7.20 | 7.03 | 8.44 |
| 3                |                                   |      |      | 6.99 | 8.45 |
| 4                | 7.11                              | 7.19 |      | 6.83 | 8.28 |
| 5                |                                   |      |      |      |      |
| 6                |                                   |      |      |      |      |
| 7                | 8.11                              | 8.37 | 9.00 | 9.18 | 7.98 |
| 8                |                                   | 8.14 | 8.20 |      | 7.80 |
| 9                | 8.15                              |      | 7.34 |      | 8.44 |
| 10               |                                   |      | 7.83 |      |      |

*NOE-buildup analysis*

NOESY spectra were recorded on a 900 MHz BRUKER Avance III HD NMR spectrometer equipped with a TCI cryoprobe. NOE build-ups were recorded without solvent suppression with mixing times of 100, 200, 300, 400, 500, 600 and 700 ms. The relaxation delay was set to 2.5 s, and 16 scans were recorded with 16384 points in the direct dimension and 512 points in the indirect dimension. Distances were calculated using geminal methylene protons (1.78 Å) as reference. The NOE peak intensities were calculated using normalization of both cross peaks and diagonal peaks according to  $([\text{cross peak}_1 \times \text{cross peak}_2]/[\text{diagonal peak}_1 \times \text{diagonal peak}_2])^{0.5}$ . At least 5 mixing times giving a linear ( $r^2 > 0.98$ ) initial NOE rate for every distance were used to determine  $\sigma_{ij}$  build-up rates (Figures S2–S6) according to the equation  $r_{ij} = r_{\text{ref}}(\sigma_{\text{ref}}/\sigma_{ij})^{(1/6)}$ , where  $r_{ij}$  is the distance between protons  $i$  and  $j$  in Ångström and  $\sigma_{ij}$  is the normalized intensity obtained from NOESY experiments. The calculated distances are given in Tables S9–S13.

**Table S9.** Interproton distances (Å) for Peptide **3a** derived from NOE build-up measurements.

|      | <b>Residue A</b> | <b>Residue B</b> | <b><math>\delta</math>A (ppm)</b> | <b><math>\delta</math>B (ppm)</b> | <b><math>\sigma</math></b> | <b>R2</b> | <b>Distance rAB (Å)</b> |
|------|------------------|------------------|-----------------------------------|-----------------------------------|----------------------------|-----------|-------------------------|
| 1    | A4NH             | P6 $\alpha$      | 7.88                              | 4.28                              | 6.9E-06                    | 0.99      | 3.55                    |
| 2    | S3NH             | A4NH             | 8.12                              | 7.88                              | 0.000034                   | 0.99      | 2.72                    |
| 3    | S3NH             | V2NH             | 8.12                              | 7.78                              | 6.14E-05                   | 0.99      | 2.47                    |
| 4    | N1NH             | V2NH             | 7.98                              | 7.78                              | 4.79E-05                   | 0.98      | 2.57                    |
| 5    | N1NH             | V2 $\alpha$      | 7.98                              | 4.11                              | 0.000128                   | 0.99      | 2.18                    |
| 6    | A4NH             | V7 $\beta$       | 7.88                              | 1.95                              | 4.3E-06                    | 0.99      | 3.84                    |
| 7    | A4NH             | G5 $\alpha$      | 7.88                              | 3.67                              | 0.000237                   | 0.99      | 1.97                    |
| 8    | hS8 $\alpha$     | S3 $\beta$ 1     | 4.38                              | 3.62                              | 5.68E-05                   | 0.99      | 2.50                    |
| 9    | V2NH             | S3 $\beta$ 1     | 7.78                              | 3.62                              | 2.7E-05                    | 0.99      | 2.83                    |
| 10   | P6 $\delta$ 1    | V7 $\alpha$      | 3.71                              | 4.32                              | 0.000199                   | 0.99      | 2.03                    |
| Ref. | P6 $\delta$ 1    | P6 $\delta$ 2    | 3.71                              | 3.54                              | 0.000436                   | 0.99      | 1.78                    |



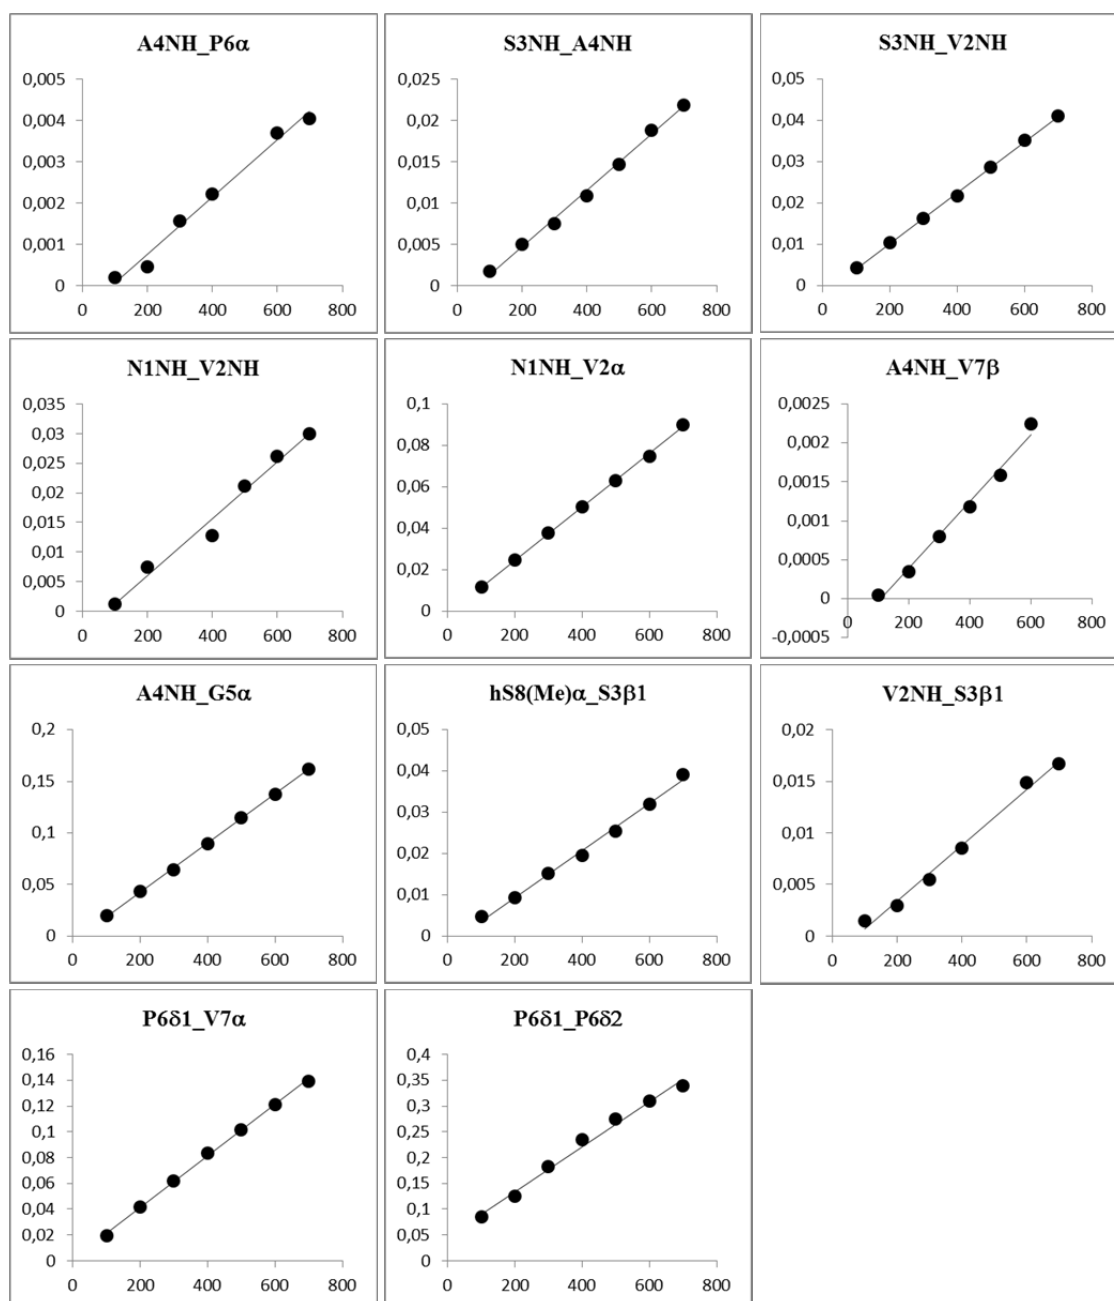

**Figure S2.** Build-up curves for interproton distances of Peptide **3a**.

**Table S10.** Interproton distances (Å) for Peptide **3b** derived from NOE build-up measurements.

|      | Residue A     | Residue B     | $\delta A$ (ppm) | $\delta B$ (ppm) | $\sigma$  | R2   | Distance rAB (Å) |
|------|---------------|---------------|------------------|------------------|-----------|------|------------------|
| 1    | hS8NH         | V7NH          | 8.15             | 8.02             | 0.0000769 | 0.99 | 2.42             |
| 2    | X3NH          | A4NH          | 8.11             | 7.84             | 0.0000299 | 0.99 | 2.83             |
| 3    | X3NH          | V2NH          | 8.11             | 7.78             | 0.0000501 | 0.99 | 2.59             |
| 4    | X3NH          | A4 $\alpha$   | 8.11             | 4.38             | 0.000292  | 0.99 | 1.93             |
| 5    | V2NH          | X3 $\beta$    | 7.78             | 1.51             | 0.0000161 | 0.99 | 3.14             |
| 6    | V7 $\alpha$   | P6 $\delta$ 2 | 4.33             | 3.55             | 0.0002994 | 0.99 | 1.93             |
| 7    | A4NH          | G5 $\alpha$ 1 | 7.84             | 3.67             | 0.0001495 | 0.99 | 2.16             |
| 8    | A4NH          | G5 $\alpha$ 2 | 7.84             | 3.61             | 0.0001714 | 0.99 | 2.11             |
| Ref. | P6 $\delta$ 1 | P6 $\delta$ 2 | 3.68             | 3.55             | 0.0004809 | 0.99 | 1.78             |

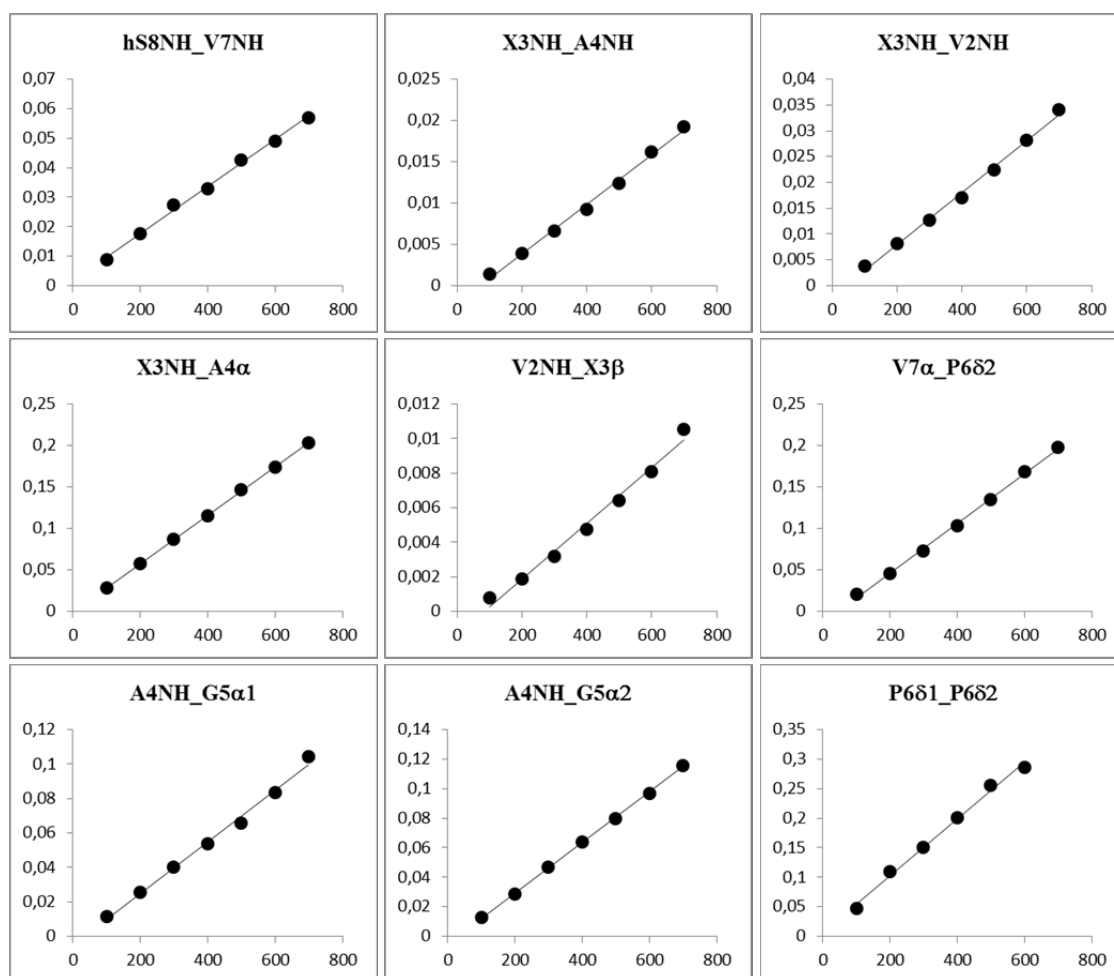

**Figure S3.** Build-up curves for interproton distances of Peptide **3b**.

**Table S11.** Interproton distances (Å) for Peptide **4a** derived from NOE build-up measurements.

|      | <b>Residue A</b> | <b>Residue B</b> | <b><math>\delta A</math> (ppm)</b> | <b><math>\delta B</math> (ppm)</b> | <b><math>\sigma</math></b> | <b>R2</b>   | <b>Distance <math>r_{AB}</math> (Å)</b> |
|------|------------------|------------------|------------------------------------|------------------------------------|----------------------------|-------------|-----------------------------------------|
| 1    | G1NH             | Q2NH             | 8.71                               | 8.12                               | 0.0000672                  | <b>0.99</b> | 2.73                                    |
| 2    | G1NH             | N10NH            | 8.71                               | 8.22                               | 0.0000445                  | <b>0.99</b> | 2.92                                    |
| 3    | G1NH             | Q2 $\alpha$      | 8.71                               | 4.30                               | 0.0002559                  | <b>0.99</b> | 2.18                                    |
| 4    | G1NH             | A9NH             | 8.71                               | 7.70                               | 0.0000093                  | <b>0.99</b> | 3.79                                    |
| 5    | hs8NH            | A9 $\alpha$      | 8.49                               | 4.42                               | 0.0001050                  | <b>0.99</b> | 2.53                                    |
| 6    | hs8NH            | A9NH             | 8.49                               | 7.70                               | 0.0001164                  | <b>0.99</b> | 2.49                                    |
| 7    | hs8NH            | V7NH             | 8.49                               | 8.25                               | 0.0000405                  | <b>0.99</b> | 2.97                                    |
| 8    | G5NH             | A4NH             | 8.44                               | 7.80                               | 0.0001222                  | <b>0.99</b> | 2.47                                    |
| 9    | G5NH             | P6 $\alpha$      | 8.44                               | 4.28                               | 0.0002312                  | <b>0.99</b> | 2.22                                    |
| 10   | S3NH             | Q2NH             | 8.29                               | 8.12                               | 0.0000366                  | <b>0.99</b> | 3.02                                    |
| 11   | S3NH             | A4NH             | 8.29                               | 7.80                               | 0.0000481                  | <b>0.99</b> | 2.88                                    |
| 12   | V7NH             | hs8 $\alpha$     | 8.25                               | 4.62                               | 0.0003674                  | <b>0.99</b> | 2.06                                    |
| 13   | V7NH             | A4NH             | 8.25                               | 7.80                               | 0.0000275                  | <b>0.99</b> | 3.17                                    |
| 14   | N10NH            | A9NH             | 8.22                               | 7.70                               | 0.0001477                  | <b>0.99</b> | 2.39                                    |
| 15   | Q2NH             | S3 $\alpha$      | 8.12                               | 4.59                               | 0.0003236                  | <b>0.99</b> | 2.10                                    |
| 16   | Q2NH             | A9NH             | 8.12                               | 7.70                               | 0.0000311                  | <b>0.99</b> | 3.10                                    |
| 17   | A4NH             | P6 $\alpha$      | 7.80                               | 4.28                               | 0.0000207                  | <b>0.98</b> | 3.32                                    |
| 18   | A9NH             | N10 $\alpha$     | 7.70                               | 4.52                               | 0.0000948                  | <b>0.99</b> | 2.58                                    |
| 19   | S3 $\alpha$      | Q2 $\alpha$      | 4.59                               | 4.30                               | 0.0000069                  | <b>0.99</b> | 3.99                                    |
| Ref. | G5 $\alpha$ 1    | G5 $\alpha$ 2    | 3.77                               | 3.52                               | 0.0008702                  | <b>0.99</b> | 1.78                                    |

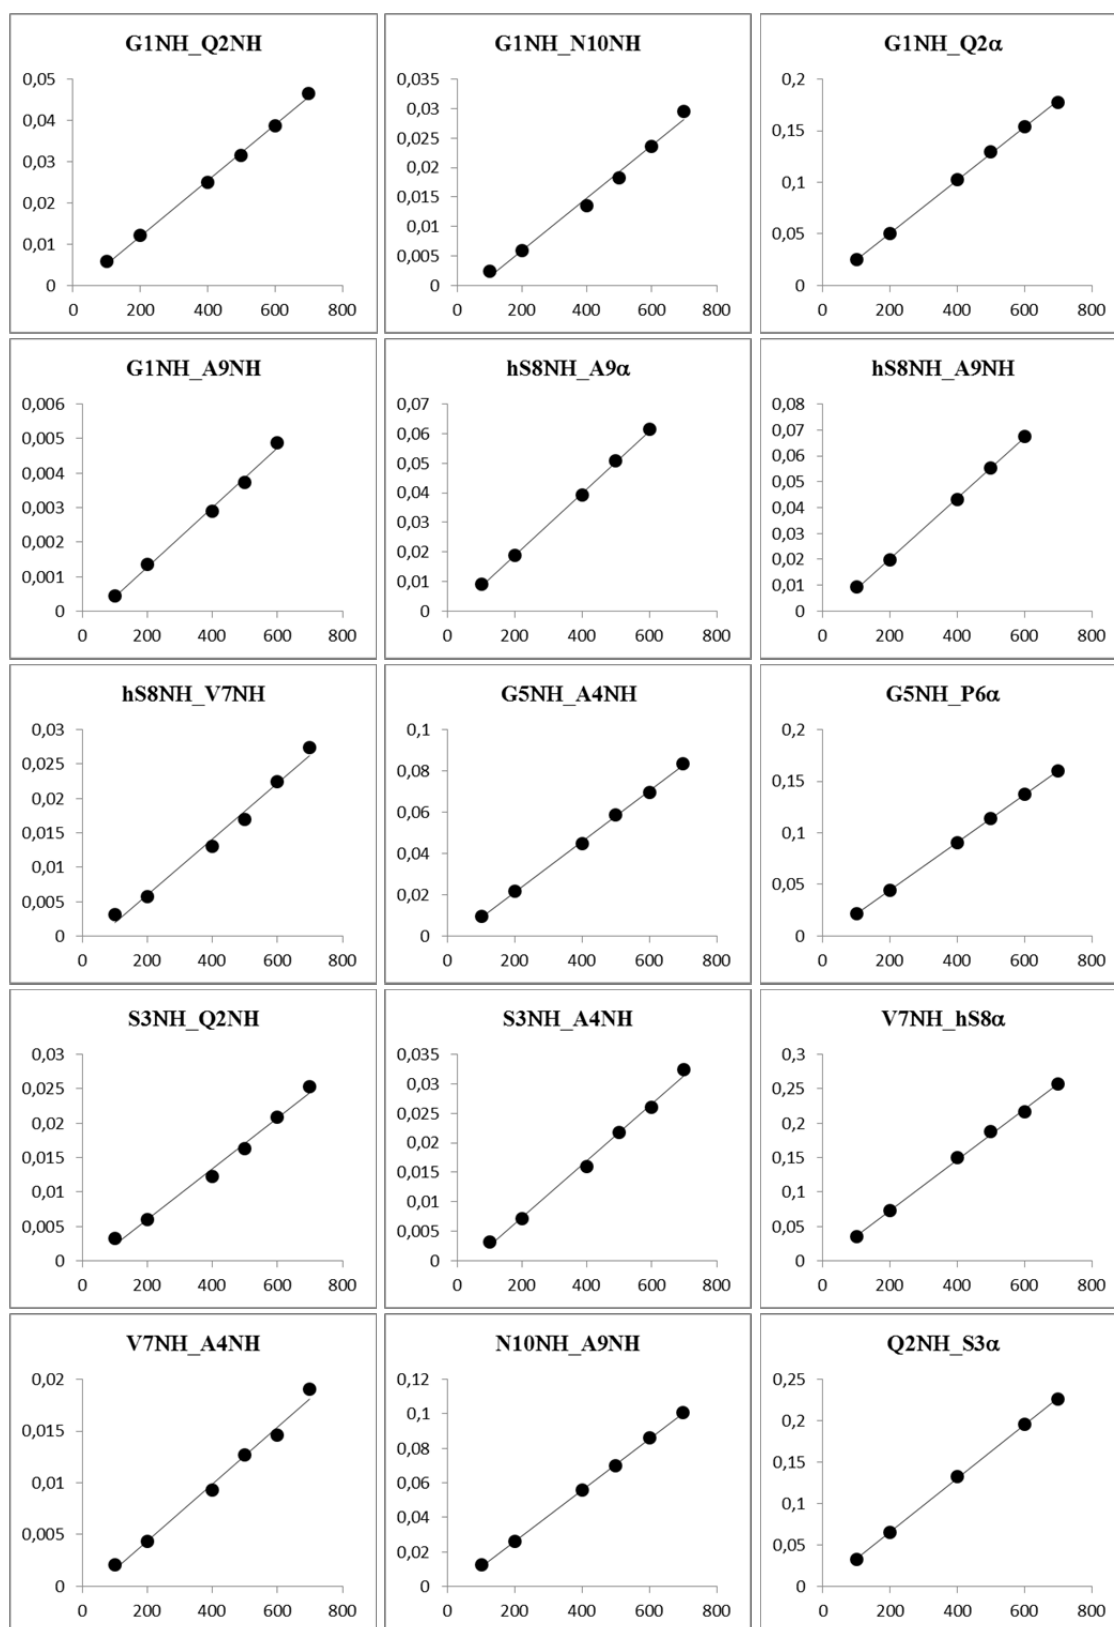

Figure S4. Build-up curves for interproton distances of Peptide 4a. *Continued on next page.*

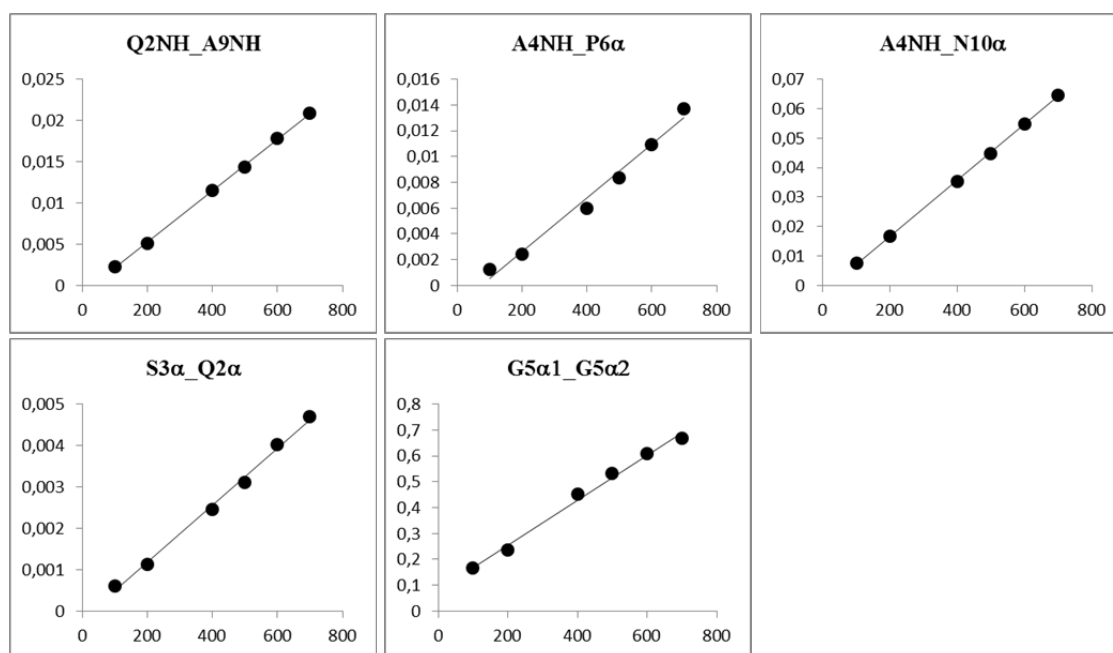

**Figure S4** *continued*. Build-up curves for interproton distances of Peptide **4a**.

**Table S12.** Interproton distances (Å) for Peptide **4b** derived from NOE build-up measurements.

|      | <b>Residue A</b> | <b>Residue B</b> | <b><math>\delta A</math> (ppm)</b> | <b><math>\delta B</math> (ppm)</b> | <b><math>\sigma</math></b> | <b>R2</b> | <b>Distance <math>r_{AB}</math> (Å)</b> |
|------|------------------|------------------|------------------------------------|------------------------------------|----------------------------|-----------|-----------------------------------------|
| 1    | G1NH             | Q2NH             | 8.90                               | 8.14                               | 0.0000207                  | 0.99      | 3.35                                    |
| 2    | G1NH             | Q2 $\alpha$      | 8.90                               | 4.32                               | 0.0002400                  | 0.99      | 2.22                                    |
| 3    | G1NH             | A9NH             | 8.90                               | 7.73                               | 0.0000036                  | 0.99      | 4.48                                    |
| 4    | hS8NH            | A9 $\alpha$      | 8.49                               | 4.52                               | 0.0001990                  | 0.99      | 2.30                                    |
| 5    | G5NH             | P6 $\alpha$      | 8.47                               | 4.27                               | 0.0001786                  | 0.99      | 2.34                                    |
| 6    | G5NH             | A4NH             | 8.47                               | 7.74                               | 0.0000506                  | 0.99      | 2.88                                    |
| 7    | V7NH             | hS8 $\alpha$     | 8.40                               | 4.73                               | 0.0002186                  | 0.99      | 2.26                                    |
| 8    | Q2NH             | X3 $\alpha$      | 8.14                               | 4.65                               | 0.0002692                  | 0.99      | 2.18                                    |
| 9    | Q2NH             | A9NH             | 8.14                               | 7.73                               | 0.0000159                  | 0.99      | 3.50                                    |
| Ref. | G5 $\alpha$ 1    | G5 $\alpha$ 2    | 3.78                               | 3.45                               | 0.0009145                  | 0.99      | 1.78                                    |

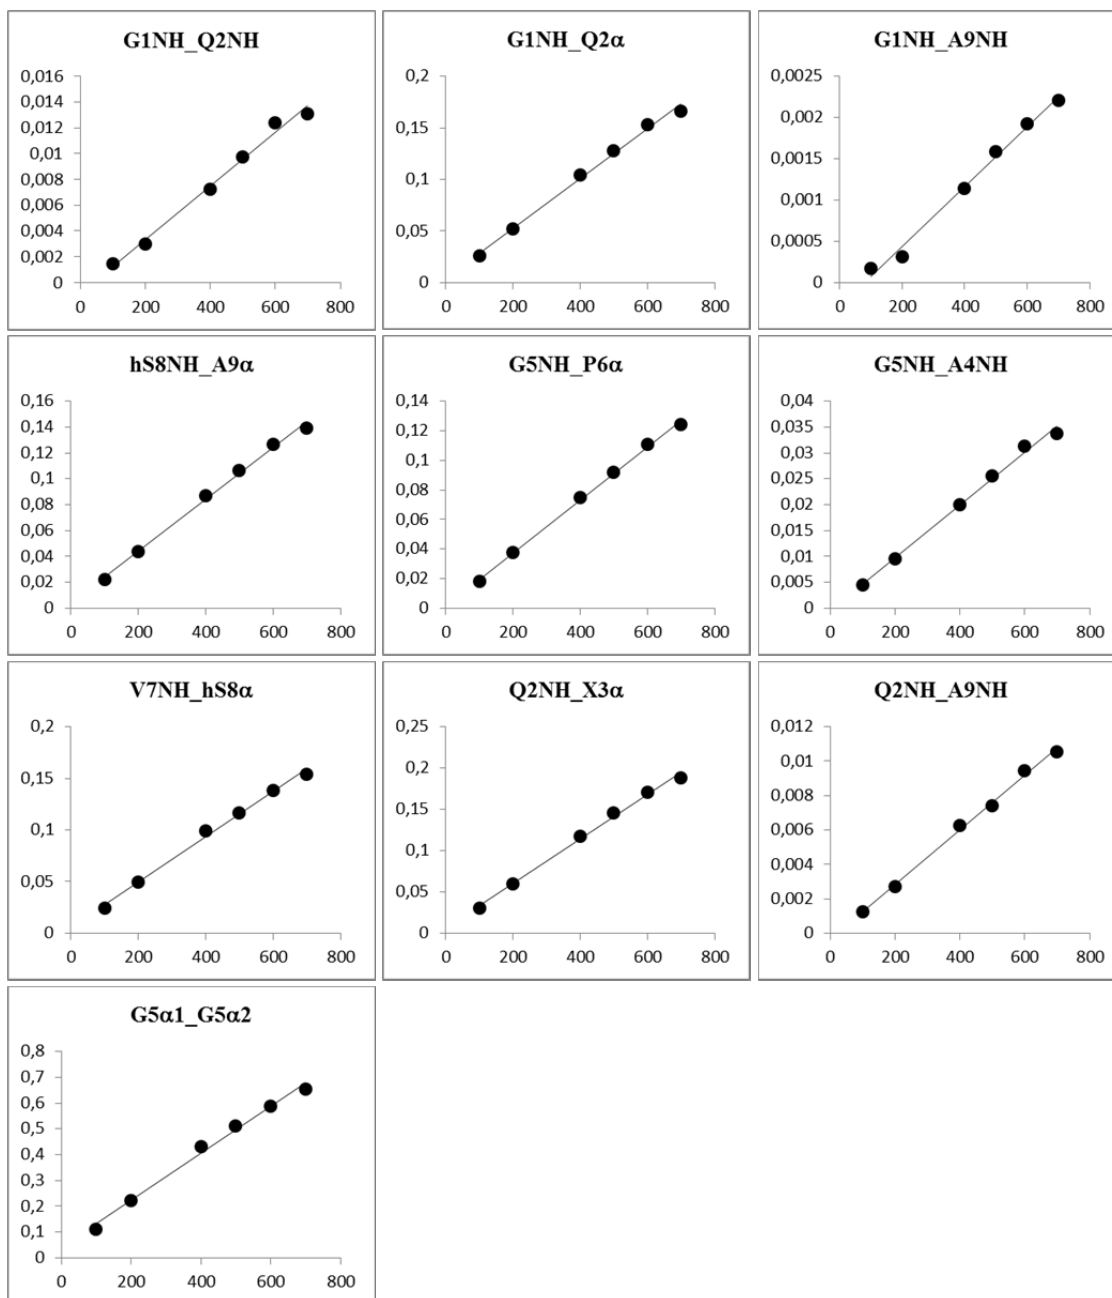

**Figure S5.** Build-up curves for interproton distances of Peptide 4b.

**Table S13.** Interproton distances (Å) for Peptide **5** derived from NOE build-up measurements.

|      | Residue A       | Residue B       | $\delta A$ (ppm) | $\delta B$ (ppm) | $\sigma$ | R2   | Distance rAB (Å) |
|------|-----------------|-----------------|------------------|------------------|----------|------|------------------|
| 1    | N1NH            | Q9NH            | 9.32             | 7.57             | 1.22E-05 | 0.99 | 3.25             |
| 2    | N1NH            | G10NH           | 9.32             | 8.18             | 9.86E-05 | 0.99 | 2.30             |
| 3    | N1NH            | V2 $\alpha$     | 9.32             | 4.19             | 0.000422 | 0.99 | 1.80             |
| 4    | S(Me)8NH        | Q9 $\alpha$     | 8.78             | 4.53             | 0.000358 | 0.99 | 1.85             |
| 5    | A(Cl)3NH        | A4NH            | 8.75             | 7.67             | 1.93E-05 | 0.98 | 3.01             |
| 6    | G5NH            | A4NH            | 8.61             | 7.67             | 0.000133 | 0.99 | 2.18             |
| 7    | V2NH            | G10NH           | 8.60             | 8.18             | 1.93E-05 | 0.99 | 3.01             |
| 8    | V2NH            | A(Cl)3 $\alpha$ | 8.60             | 5.25             | 0.000373 | 0.99 | 1.84             |
| 9    | V2NH            | Q9NH            | 8.60             | 7.57             | 8.11E-05 | 0.99 | 2.37             |
| 10   | V7NH            | A4NH            | 8.51             | 7.67             | 5.10E-05 | 0.99 | 2.56             |
| 11   | V7NH            | A(Cl)3 $\alpha$ | 8.51             | 5.25             | 8.48E-05 | 0.99 | 2.35             |
| 12   | G10NH           | N1 $\alpha$     | 8.18             | 4.07             | 0.000119 | 0.99 | 2.22             |
| 13   | G10NH           | V2 $\alpha$     | 8.18             | 4.19             | 2.74E-05 | 0.99 | 2.84             |
| 14   | G10NH           | Q9NH            | 8.18             | 7.57             | 0.00013  | 0.99 | 2.19             |
| 15   | Q9NH            | S(Me)8 $\alpha$ | 7.57             | 4.80             | 5.56E-06 | 0.98 | 3.71             |
| 16   | Q9NH            | N1 $\alpha$     | 7.57             | 4.07             | 1.32E-05 | 0.99 | 3.21             |
| 17   | A(Cl)3 $\alpha$ | A4 $\alpha$     | 5.25             | 4.66             | 1.60E-05 | 0.98 | 3.11             |
| 18   | A(Cl)3 $\alpha$ | Q9 $\alpha$     | 5.25             | 4.53             | 4.35E-06 | 0.99 | 3.86             |
| 19   | A(Cl)3 $\alpha$ | S(Me)8 $\alpha$ | 5.25             | 4.80             | 0.000168 | 0.99 | 2.10             |
| 20   | S(Me)8 $\alpha$ | Q9 $\alpha$     | 4.80             | 4.53             | 2.09E-05 | 0.99 | 2.97             |
| Ref. | N1 $\beta$ 1    | N1 $\beta$ 2    | 2.91             | 2.43             | 0.000453 | 0.99 | 1.78             |

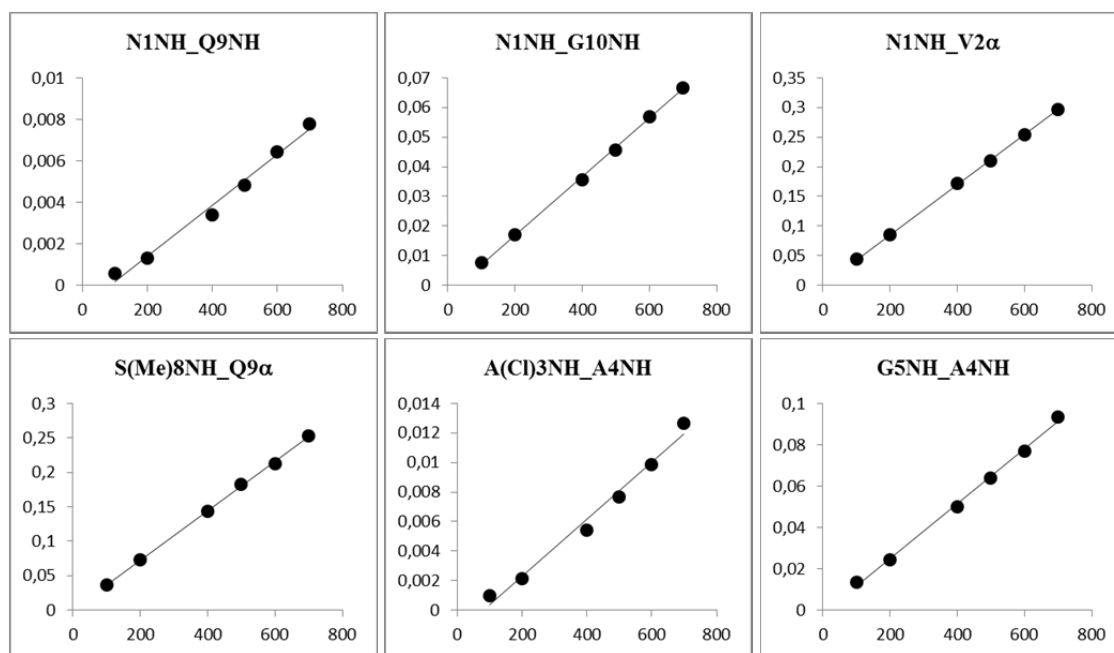**Figure S6.** Build-up curves for interproton distances of Peptide **5**. *Continued on next page.*

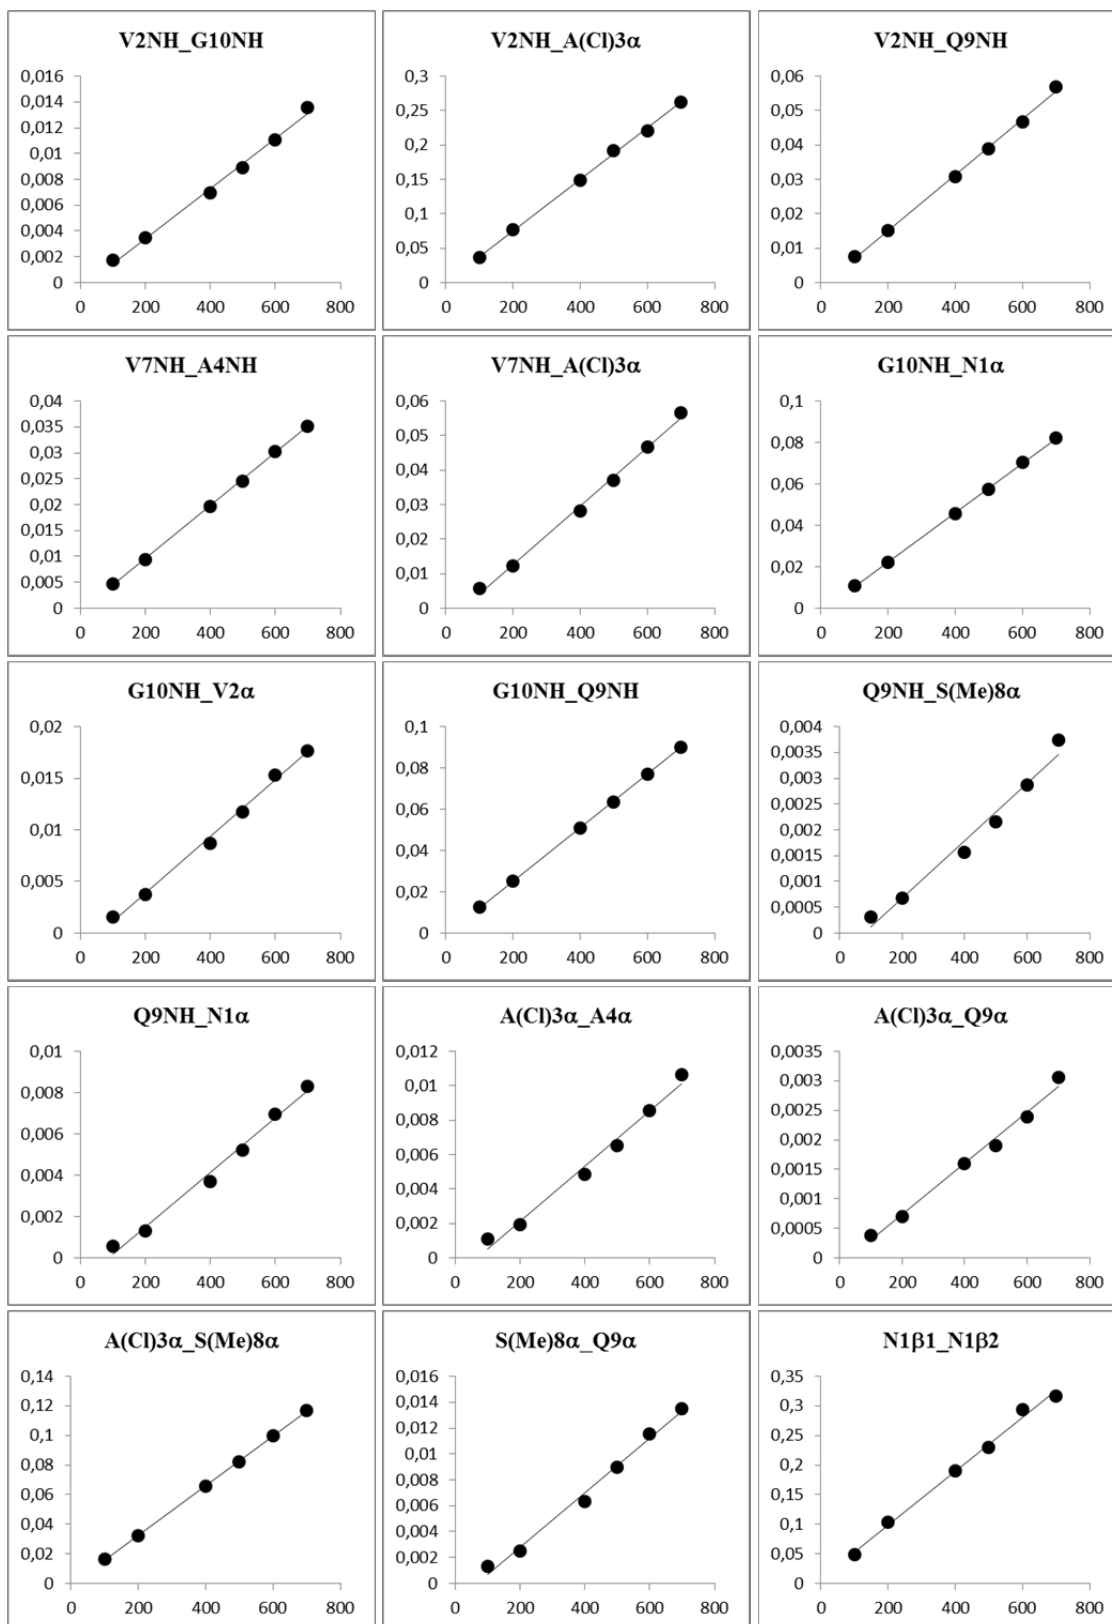

**Figure S6 continued.** Build-up curves for interproton distances of Peptide 5.

*VT-NMR (temperature coefficients)*

Amide temperature coefficients,  $\Delta\delta_{\text{NH}}/\Delta T$  (ppb  $\text{K}^{-1}$ ), were obtained by running  $^1\text{H}$  and TOCSY NMR spectra at 25–65 °C on a 500 MHz Varian spectrometer in  $\text{DMSO-}d_6$ . The

amide temperature coefficient ( $\Delta\delta_{\text{NH}}/\Delta T$ ) were obtained from  $(\delta_{\text{T,high}} - \delta_{\text{T,low}})/(T_{\text{high}} - T_{\text{low}})$ , which provides negative values but are reported as positive values.  $\Delta\delta_{\text{NH}}/\Delta T < 3$  indicates a strong intramolecular hydrogen bond,  $\Delta\delta_{\text{NH}}/\Delta T = 3-5$  indicates that the amide proton is in equilibrium between a solvent exposed and an intramolecular hydrogen bond and  $\Delta\delta_{\text{NH}}/\Delta T > 5$  that the amide proton is solvent exposed.<sup>6</sup> Plotting  $\delta_{\text{NH}}$  against temperature gave  $r^2 > 0.99$  for all amide protons. The DMSO- $d_6$  residual solvent signal was used as chemical shift reference, with its temperature dependence taken in consideration following published calibration data.<sup>7</sup> The results are summarized in Tables S14–S18.

**Table S14.** Amide proton temperature coefficients  $\Delta\delta_{\text{NH}}/\Delta T$  (ppb  $\text{K}^{-1}$ ) in DMSO- $d_6$  for **3a**.

| Temp. (°C)                          | N1-NH  | V2-NH  | S3-NH  | A4-NH  | G5-NH  | V7-NH  | hS8-NH | Q9-NH  | G10-NH |
|-------------------------------------|--------|--------|--------|--------|--------|--------|--------|--------|--------|
| 25                                  | 7.970  | 7.773  | 8.117  | 7.870  | 7.978  | 7.931  | 8.089  | 8.074  | 8.096  |
| 33                                  | 7.939  | 7.734  | 8.066  | 7.838  | 7.954  | 7.881  | 8.048  | 8.038  | 8.052  |
| 40                                  | 7.912  | 7.703  | 8.026  | 7.811  | 7.935  | 7.841  | 8.010  | 8.004  | 8.014  |
| 47                                  | 7.887  | 7.672  | 7.985  | 7.785  | 7.914  | 7.801  | 7.972  | 7.985  | 7.972  |
| 55                                  | 7.856  | 7.636  | 7.939  | 7.754  | 7.887  | 7.771  | 7.939  | 7.940  | 7.939  |
| 65                                  | 7.822  | 7.593  | 7.875  | 7.717  | 7.853  | 7.702  | 7.884  | 7.900  | 7.867  |
| $\Delta\delta_{\text{NH}}$          | -0.148 | -0.180 | -0.242 | -0.153 | -0.125 | -0.229 | -0.205 | -0.174 | -0.229 |
| $\Delta\delta_{\text{NH}}/\Delta T$ | -3.6   | -4.4   | -6.0   | -3.8   | -3.1   | -5.6   | -5.1   | -4.3   | -5.6   |

**Table S15.** Amide proton temperature coefficients  $\Delta\delta_{\text{NH}}/\Delta T$  (ppb  $\text{K}^{-1}$ ) in DMSO- $d_6$  for **3b**.

| Temp. (°C)                          | N1-NH  | V2-NH  | X3-NH  | A4-NH  | G5-NH  | V7-NH  | hS8-NH | Q9-NH  | G10-NH |
|-------------------------------------|--------|--------|--------|--------|--------|--------|--------|--------|--------|
| 25                                  | 8.034  | 7.773  | 8.107  | 7.837  | 8.039  | 8.013  | 8.146  | 8.083  | 8.077  |
| 33                                  | 7.996  | 7.735  | 8.057  | 7.809  | 8.017  | 7.956  | 8.101  | 8.048  | 8.042  |
| 40                                  | 7.962  | 7.699  | 8.015  | 7.782  | 7.989  | 7.910  | 8.059  | 8.017  | 8.017  |
| 47                                  | 7.937  | 7.668  | 7.984  | 7.759  | 7.964  | 7.882  | 8.023  | 7.993  | 7.988  |
| 55                                  | 7.889  | 7.627  | 7.931  | 7.728  | 7.924  | 7.827  | 7.976  | 7.954  | 7.938  |
| 65                                  | 7.846  | 7.581  | 7.878  | 7.695  | 7.883  | 7.762  | 7.919  | 7.910  | 7.890  |
| $\Delta\delta_{\text{NH}}$          | -0.188 | -0.192 | -0.229 | -0.142 | -0.156 | -0.251 | -0.227 | -0.173 | -0.187 |
| $\Delta\delta_{\text{NH}}/\Delta T$ | -4.6   | -4.7   | -5.6   | -3.5   | -3.8   | -6.2   | -5.6   | -4.3   | -4.6   |



**Table S16.** Amide proton temperature coefficients  $\Delta\delta_{\text{NH}}/\Delta T$  (ppb K<sup>-1</sup>) in DMSO-*d*<sub>6</sub> for **4a**.

| Temp. (°C)                          | G1-NH  | Q2-NH  | S3-NH  | A4-NH  | G5-NH  | V7-NH | hS8-NH | A9-NH  | N10-NH |
|-------------------------------------|--------|--------|--------|--------|--------|-------|--------|--------|--------|
| 25                                  | 8.714  | 8.130  | 8.308  | 7.812  | 8.444  | 8.244 | 8.499  | 7.714  | 8.219  |
| 33                                  | 8.657  | 8.114  | 8.273  | 7.807  | 8.393  | 8.21  | 8.459  | 7.693  | 8.171  |
| 47                                  | 8.563  | 8.086  | 8.21   | 7.795  | 8.308  | 8.151 | 8.389  | 7.662  | 8.094  |
| 55                                  | 8.513  | 8.069  | 8.173  | 7.789  | 8.261  | 8.117 | 8.349  | 7.646  | 8.054  |
| 65                                  | 8.451  | 8.045  | 8.126  | 7.777  | 8.203  | 8.074 | 8.297  | 7.627  | 8.008  |
| $\Delta\delta_{\text{NH}}$          | -0.263 | -0.085 | -0.182 | -0.035 | -0.241 | -0.17 | -0.202 | -0.087 | -0.211 |
| $\Delta\delta_{\text{NH}}/\Delta T$ | -6.6   | -2.1   | -4.6   | -0.9   | -6.0   | -4.2  | -5.1   | -2.2   | -5.3   |

**Table S17.** Amide proton temperature coefficients  $\Delta\delta_{\text{NH}}/\Delta T$  (ppb K<sup>-1</sup>) in DMSO-*d*<sub>6</sub> for **4b**.

| Temp. (°C)                          | G1-NH  | Q2-NH  | X3-NH  | A4-NH  | G5-NH  | V7-NH  | hS8-NH | A9-NH  | N10-NH |
|-------------------------------------|--------|--------|--------|--------|--------|--------|--------|--------|--------|
| 25                                  | 8.825  | 8.166  | 8.351  | 7.802  | 8.383  | 8.387  | 8.412  | 7.763  | 8.368  |
| 33                                  | 8.769  | 8.147  | 8.311  | 7.797  | 8.332  | 8.358  | 8.371  | 7.747  | 8.307  |
| 40                                  | 8.716  | 8.127  | 8.284  | 7.79   | 8.297  | 8.332  | 8.332  | 7.73   | 8.273  |
| 55                                  | 8.606  | 8.081  | 8.218  | 7.774  | 8.203  | 8.27   | 8.244  | 7.696  | 8.189  |
| 65                                  | 8.534  | 8.052  | 8.182  | 7.764  | 8.138  | 8.218  | 8.2    | 7.676  | 8.121  |
| $\Delta\delta_{\text{NH}}$          | -0.291 | -0.114 | -0.169 | -0.038 | -0.245 | -0.169 | -0.212 | -0.087 | -0.247 |
| $\Delta\delta_{\text{NH}}/\Delta T$ | -7.3   | -2.9   | -4.2   | -0.9   | -6.1   | -4.2   | -5.3   | -2.2   | -6.2   |

**Table S18.** Amide proton temperature coefficients  $\Delta\delta_{\text{NH}}/\Delta T$  (ppb K<sup>-1</sup>) in DMSO-*d*<sub>6</sub> for **5**.

| Temp.<br>(°C)                       | N1-<br>NH | V2-<br>NH | A(Cl)3-<br>NH | A4-<br>NH | G5-<br>NH | V7-<br>NH | S(Me)8-<br>NH | Q9-<br>NH | G10-<br>NH |
|-------------------------------------|-----------|-----------|---------------|-----------|-----------|-----------|---------------|-----------|------------|
| 25                                  | 9.316     | 8.582     | 8.754         | 7.671     | 8.599     | 8.514     | 8.779         | 7.576     | 8.173      |
| 30                                  | 9.287     | 8.566     | 8.730         | 7.665     | 8.583     | 8.499     | 8.755         | 7.568     | 8.142      |
| 35                                  | 9.255     | 8.550     | 8.703         | 7.658     | 8.567     | 8.482     | 8.728         | 7.559     | 8.108      |
| 40                                  | 9.223     | 8.533     | 8.678         | 7.652     | 8.551     | 8.465     | 8.702         | 7.552     | 8.075      |
| 45                                  | 9.189     | 8.515     | 8.651         | 7.646     | 8.533     | 8.447     | 8.674         | 7.543     | 8.041      |
| 50                                  | 9.153     | 8.496     | 8.624         | 7.639     | 8.514     | 8.427     | 8.645         | 7.534     | 8.006      |
| $\Delta\delta_{\text{NH}}$          | -0.163    | -0.086    | -0.130        | -0.032    | -0.085    | -0.087    | -0.134        | -0.042    | -0.167     |
| $\Delta\delta_{\text{NH}}/\Delta T$ | -6.5      | -3.4      | -5.2          | -1.3      | -3.4      | -3.5      | -5.4          | -1.7      | -6.7       |

#### Methoxy temperature coefficients

The hS8 methoxy temperature dependence, for peptides **2a-b** and **5**, were measured and calculated the same way as described above for the amide protons.

**Table S19.** hS8 Methoxy methyl proton temperature coefficients  $\Delta\delta/\Delta T$  (ppb K<sup>-1</sup>) in DMSO-*d*<sub>6</sub>, for the temperature interval 25–100 °C.

|                         | <b>2a</b> | <b>2b</b> | <b>5</b> |
|-------------------------|-----------|-----------|----------|
| $\Delta\delta$          | -0.014    | -0.005    | -0.024   |
| $\Delta T$              | 75        | 75        | 75       |
| $\Delta\delta/\Delta T$ | -0.19     | -0.07     | -0.32    |

#### 4. Computational conformational analysis

Conformational searches were performed using the Monte Carlo algorithm with intermediate torsion sampling, 50000 Monte Carlo steps, and RMSD cut-off set to 2.0 Å, followed by Molecular Mechanics energy minimization with the software Macromodel (v.9.1) as implemented in the Schrödinger package. For **3a-b** and **4 a-b**, two independent searches were performed using OPLS-2005 or Amber\* as force field, and with water solvation model. The conformational search for peptide **5** and **8** was also performed with the force field OPLS-3<sup>8</sup>, a new version of OPLS with parameters for aromatic halogen bonding included. Energy minimization was performed using the Polak-Ribiere type conjugate gradient (PRCG) with maximum iteration steps set to 5000. All conformations within 42 kJ/mol from the global minimum were saved. The ensembles from the conformational searches using the different force fields were combined and elimination of redundant conformations was performed by the comparison of heavy atom coordinates applying a RMSD cutoff of 2.5 Å for the cyclic peptides and 3.0 Å for the linear ones, giving the ensembles used in NAMFIS. The results are summarized in Table S20. Since the force fields used do not include parameters for aliphatic halogen bonds, no conformations with halogen bonding interaction were obtained from the conformational analyses of peptide **5** and **8**. Therefore, a hairpin conformer was minimized with constrained Cl/Br-OMe distances and angles and these conformers were then added to the corresponding ensemble. The constraints used to generate these conformers were: Cl-OMe

distance 2.94 Å +/- 10% (corresponding to 90% of the sum of the van der Waals radii), Br-OMe distance 3.03 Å +/- 10% (corresponding to 90% of the sum of the van der Waals radii), C-Cl-O(Me) angle (180° +/-10%) and C-Br-O(Me) angle (180° +/-10%).

**Table S20.** Results of the conformational analysis.

|           |        | Number of conformations |                                 |                                              |
|-----------|--------|-------------------------|---------------------------------|----------------------------------------------|
|           |        | Total <sup>a</sup>      | Within 12.6 kJ/mol <sup>b</sup> | <sup>c</sup> Redundant conformer elimination |
| <b>3a</b> | OPLS   | 1502                    | 32                              | 427                                          |
|           | Amber* | 520                     | 16                              |                                              |
| <b>3b</b> | OPLS   | 1404                    | 23                              | 396                                          |
|           | Amber* | 746                     | 20                              |                                              |
| <b>4a</b> | OPLS   | 173                     | 13                              | 52                                           |
|           | Amber* | 201                     | 21                              |                                              |
| <b>4b</b> | OPLS   | 184                     | 31                              | 34                                           |
|           | Amber* | 361                     | 9                               |                                              |
| <b>5</b>  | OPLS   | 204                     | 23                              | 138                                          |
|           | Amber* | 135                     | 10                              |                                              |
|           | OPLS-3 | 35                      | 4                               |                                              |
| <b>8</b>  | OPLS   | 289                     | 17                              | 97                                           |
|           | Amber* | 216                     | 11                              |                                              |
|           | OPLS-3 | 22                      | 3                               |                                              |

<sup>a</sup>Total number of unique conformations found. <sup>b</sup>Conformations found within 12.6 kJ/mol (3.0 kcal/mol) of the global minimum. <sup>c</sup>Conformations obtained after redundant conformation elimination with the root-mean-square deviation cutoff 2.5 Å (cyclic peptides) and 3.0 Å (linear peptides) for heavy atoms. This conformation ensemble is used as input in the NAMFIS analysis. To the ensembles of **5** and **8** a halogen bond constrained peptide was added, see text for details.

## 5. Identification of solution ensemble using the NAMFIS algorithm

Solution ensembles were determined by fitting the experimentally measured distances and coupling constants to those back-calculated for computationally predicted conformations following previously described protocols.<sup>9</sup> Dihedral angles were calculated from experimental coupling constants using a Karplus equation specifically developed for peptides.<sup>10,11</sup> NOE-derived distances are presented in Tables S9–S13, whereas coupling constants are presented in Table S8. The results of the NAMFIS-analysis are given in Table S21. Since the side chain orientations are poorly predicted by the conformational searches only back bone interactions were included in the NAMFIS analyses, with the exception of the highly flexible linear peptides where some side chain positions had to be included in order to get enough data to perform the analysis. The ensemble analyses were validated using standard methods, that is,

through evaluation of the reliability of the conformational restraints by the addition of 10% random noise to the experimental data, by the random removal of individual restraints, and by comparison of the experimentally observed and back-calculated distances and scalar coupling constants.

**Table S21.** Result of the NAMFIS-analyses for peptides **3a-b**, **4a-b** and **5**.

| <b>3a</b>              |                | <b>3b</b>              |                | <b>4a</b>              |                | <b>4b</b>              |                | <b>5</b>               |                |
|------------------------|----------------|------------------------|----------------|------------------------|----------------|------------------------|----------------|------------------------|----------------|
| Conf. No. <sup>a</sup> | % <sup>b</sup> |
| 1                      | 2              | 1                      | 12             | 1                      | 14             | <i>1</i>               | <i>13</i>      | <i>1</i>               | <i>9</i>       |
| 2                      | 23             | 2                      | 5              | 2                      | 4              | <i>2</i>               | <i>14</i>      | 2                      | 2              |
| <i>3</i>               | <i>11</i>      | 3                      | 19             | 3                      | 2              | 3                      | 26             | <i>3</i>               | <i>16</i>      |
| 4                      | 18             | 4                      | 13             | 4                      | 15             | 4                      | 7              | 4                      | 4              |
| 5                      | 2              | 5                      | 21             | <i>5</i>               | <i>36</i>      | <i>5</i>               | <i>4</i>       | 5                      | 12             |
| 6                      | 18             | 6                      | 6              | 6                      | 10             | 6                      | 5              | 6                      | 7              |
| 7                      | 13             | 7                      | 20             | 7                      | 9              | 7                      | 2              | <i>7</i>               | <i>26</i>      |
| 8                      | 12             | 8                      | 3              | 8                      | 5              | 8                      | 28             | <i>8</i>               | <i>19</i>      |
|                        |                |                        |                | 9                      | 4              |                        |                | <i>9</i>               | <i>4</i>       |

<sup>a</sup>The structures of the most populated conformations are shown in Figures S7–S11. <sup>b</sup>The hairpin population in solution. Hairpin conformations are indicated by numbers in *italic*. The hairpin content was calculated to 11% for **3a**, 0% for **3b**, 36% for **4a**, 31% for **4b** and 74% for **5**.

**Table S22.** Experimentally determined and back-calculated (NAMFIS) interproton distances (Å) and coupling constants (Hz) for the solution ensemble of **3a**.

| <b>Interproton distances</b> |              | <b>Coupling constants</b> |              |
|------------------------------|--------------|---------------------------|--------------|
| <u>Exp.</u>                  | <u>Calc.</u> | <u>Exp.</u>               | <u>Calc.</u> |
| 3.55                         | 4.14         | 7.9                       | 7.9          |
| 2.72                         | 2.68         | 8.1                       | 8.0          |
| 2.47                         | 2.51         | 8.2                       | 7.9          |
| 2.57                         | 2.70         | 5.5                       | 5.6          |
| 2.18                         | 2.42         | 7.1                       | 7.3          |
| 3.84                         | 4.56         |                           |              |
| 1.97                         | 2.59         |                           |              |
| 2.50                         | 2.91         |                           |              |
| 2.83                         | 2.89         |                           |              |
| 2.03                         | 2.44         |                           |              |

*RMSD distances = 0.41*

*RMSD coupling constants = 0.17*

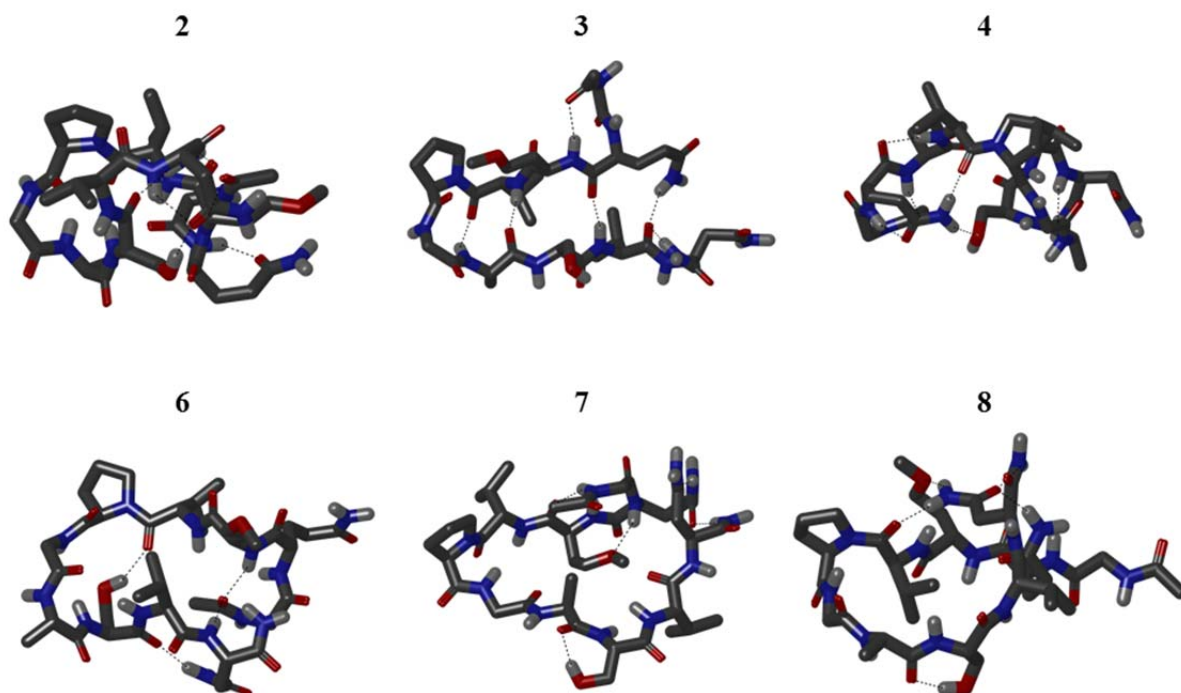

**Figure S7.** The most populated solution conformations of **3a**, as selected by the NAMFIS-analysis. Populations in % are given in Table S21. Hydrogen bonds are indicated by black dotted lines. Non-polar hydrogens are omitted for clarity.

**Table S23.** Experimentally determined and back-calculated (NAMFIS) interproton distances (Å) and coupling constants (Hz) for the solution ensemble of **3b**.

| Interproton distances |              | Coupling constants |              |
|-----------------------|--------------|--------------------|--------------|
| <u>Exp.</u>           | <u>Calc.</u> | <u>Exp.</u>        | <u>Calc.</u> |
| 2.42                  | 2.43         | 8.1                | 7.9          |
| 2.83                  | 2.86         | 7.2                | 7.2          |
| 2.59                  | 2.56         | 8.4                | 8.2          |
| 1.93                  | 2.27         | 6.0                | 6.1          |
| 3.14                  | 3.40         |                    |              |
| 1.93                  | 2.46         |                    |              |
| 2.16                  | 2.52         |                    |              |
| 2.11                  | 2.51         |                    |              |

*RMSD distances = 0.31*                      *RMSD coupling constants = 0.18*

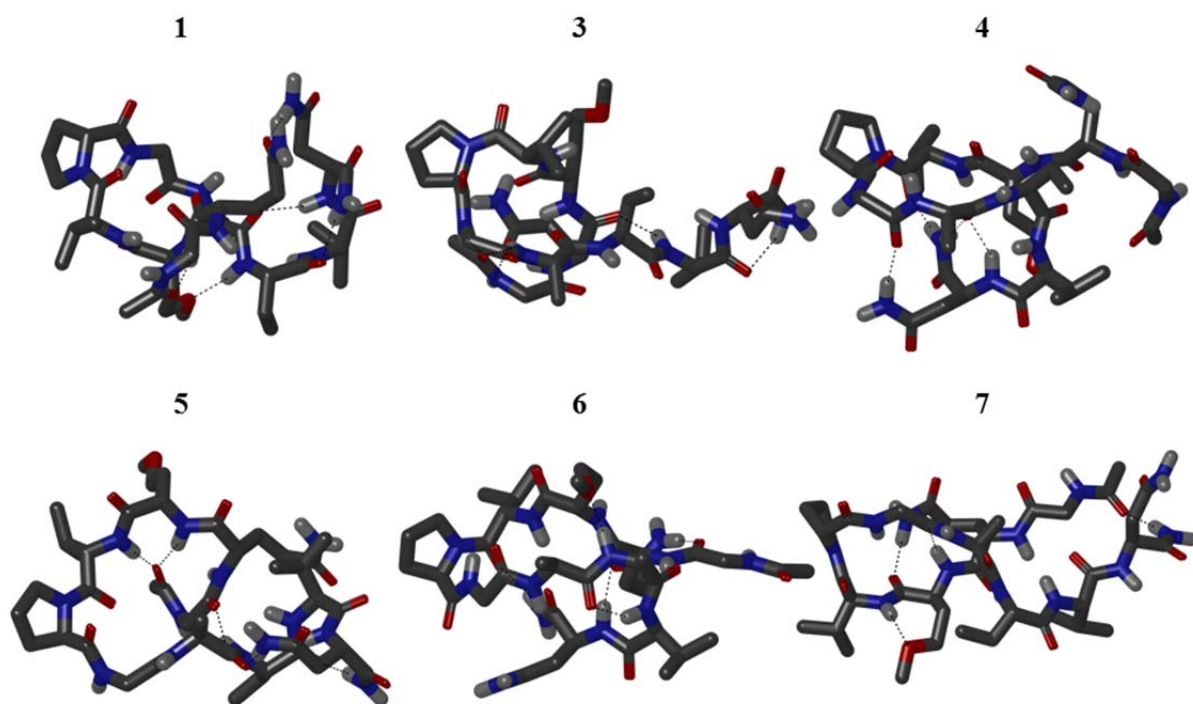

**Figure S8.** The most populated solution conformations of **3b**, as selected by the NAMFIS-analysis. Populations in % are given in Table S21. Hydrogen bonds are indicated by black dotted lines. Non-polar hydrogens are omitted for clarity.

**Table S24.** Experimentally determined and back-calculated (NAMFIS) interproton distances (Å) and coupling constants (Hz) for the solution ensemble of **4a**.

| <b>Interproton distances</b> |              | <b>Coupling constants</b> |              |
|------------------------------|--------------|---------------------------|--------------|
| <u>Exp.</u>                  | <u>Calc.</u> | <u>Exp.</u>               | <u>Calc.</u> |
| 2.73                         | 3.13         | 8.2                       | 8.0          |
| 2.92                         | 2.98         | 7.8                       | 7.2          |
| 2.18                         | 2.33         | 9.0                       | 8.7          |
| 3.79                         | 3.51         | 7.2                       | 7.2          |
| 2.53                         | 3.34         | 7.3                       | 7.7          |
| 2.49                         | 2.37         |                           |              |
| 2.97                         | 3.25         |                           |              |
| 2.47                         | 2.48         |                           |              |
| 2.22                         | 2.32         |                           |              |
| 3.02                         | 3.08         |                           |              |
| 2.88                         | 2.78         |                           |              |
| 2.06                         | 2.30         |                           |              |
| 3.17                         | 3.46         |                           |              |
| 2.39                         | 2.55         |                           |              |
| 2.10                         | 2.39         |                           |              |
| 3.10                         | 3.38         |                           |              |
| 3.32                         | 3.66         |                           |              |
| 2.58                         | 2.58         |                           |              |
| 3.99                         | 4.58         |                           |              |

*RMSD distances = 0.31*

*RMSD coupling constants = 0.34*

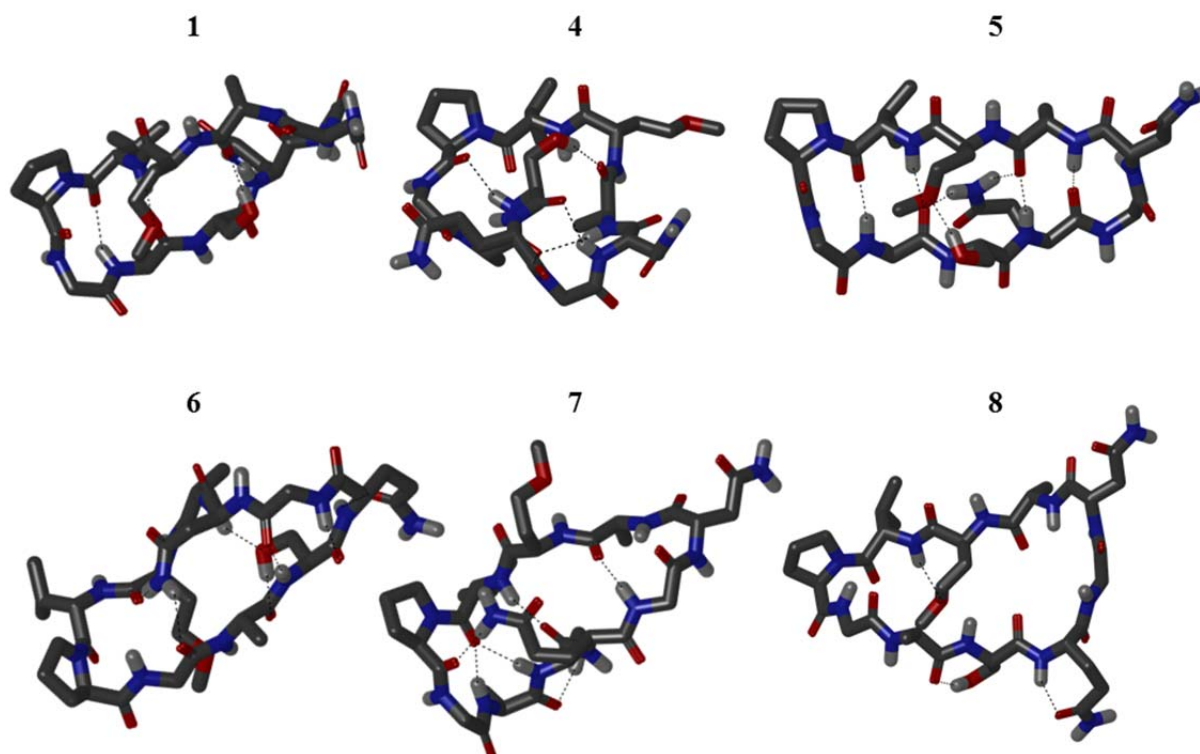

**Figure S9.** The most populated solution conformations of **4a**, as selected by the NAMFIS-analysis. Populations in % are given in Table S21. Hydrogen bonds are indicated by black dotted lines. Non-polar hydrogens are omitted for clarity.

**Table S25.** Experimentally determined and back-calculated (NAMFIS) interproton distances (Å) and coupling constants (Hz) for the solution ensemble of **4b**.

| Interproton distances |              | Coupling constants |              |
|-----------------------|--------------|--------------------|--------------|
| <u>Exp.</u>           | <u>Calc.</u> | <u>Exp.</u>        | <u>Calc.</u> |
| 3.35                  | 3.29         | 7.2                | 7.2          |
| 2.22                  | 2.26         | 7.0                | 7.2          |
| 4.48                  | 4.41         | 6.8                | 7.2          |
| 2.30                  | 2.35         | 9.2                | 8.8          |
| 2.34                  | 2.36         | 7.0                | 7.1          |
| 2.88                  | 2.95         |                    |              |
| 2.26                  | 2.34         |                    |              |
| 2.18                  | 2.40         |                    |              |
| 3.50                  | 3.72         |                    |              |

---

*RMSD distances = 0.12*                      *RMSD coupling constants = 0.25*



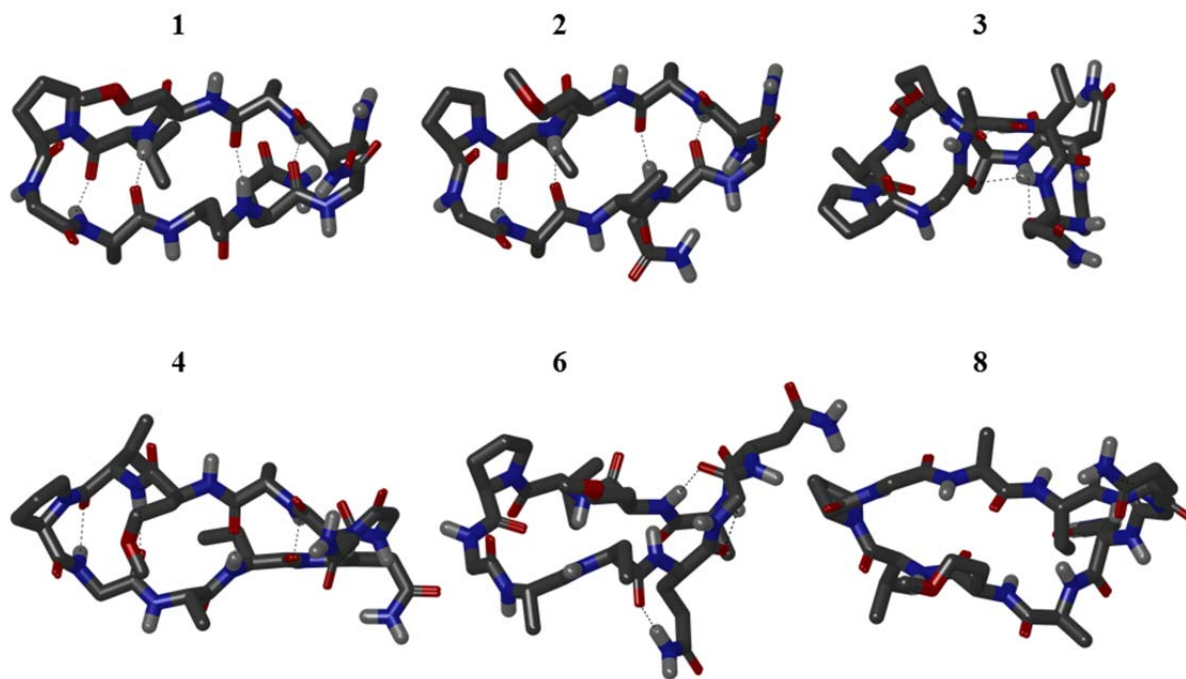

**Figure S10.** The most populated solution conformations of **4b**, as selected by the NAMFIS-analysis. Populations in % are given in Table S21. Hydrogen bonds are indicated by black dotted lines. Non-polar hydrogens are omitted for clarity.

**Table S26.** Experimentally determined and back-calculated (NAMFIS) interproton distances (Å) and coupling constants (Hz) for the solution ensemble of **5**.

| <b>Interproton distances</b> |              | <b>Coupling constants</b> |              |
|------------------------------|--------------|---------------------------|--------------|
| <u>Exp.</u>                  | <u>Calc.</u> | <u>Exp.</u>               | <u>Calc.</u> |
| 3.25                         | 3.51         | 6.8                       | 7.7          |
| 2.30                         | 2.74         | 8.4                       | 7.7          |
| 1.80                         | 2.25         | 8.4                       | 8.2          |
| 1.85                         | 2.29         | 8.3                       | 9.2          |
| 3.01                         | 3.00         | 8.0                       | 8.5          |
| 2.18                         | 2.48         | 7.8                       | 6.8          |
| 3.01                         | 3.93         | 8.4                       | 9.2          |
| 1.84                         | 2.28         |                           |              |
| 2.37                         | 3.12         |                           |              |
| 2.56                         | 3.39         |                           |              |
| 2.35                         | 2.98         |                           |              |
| 2.22                         | 2.74         |                           |              |
| 2.84                         | 4.03         |                           |              |
| 2.19                         | 2.36         |                           |              |
| 3.71                         | 4.70         |                           |              |
| 3.21                         | 4.12         |                           |              |
| 3.11                         | 4.61         |                           |              |
| 3.86                         | 4.43         |                           |              |
| 2.10                         | 2.47         |                           |              |
| 2.97                         | 4.49         |                           |              |

*RMSD distances = 0.77*                      *RMSD coupling constants = 0.78*

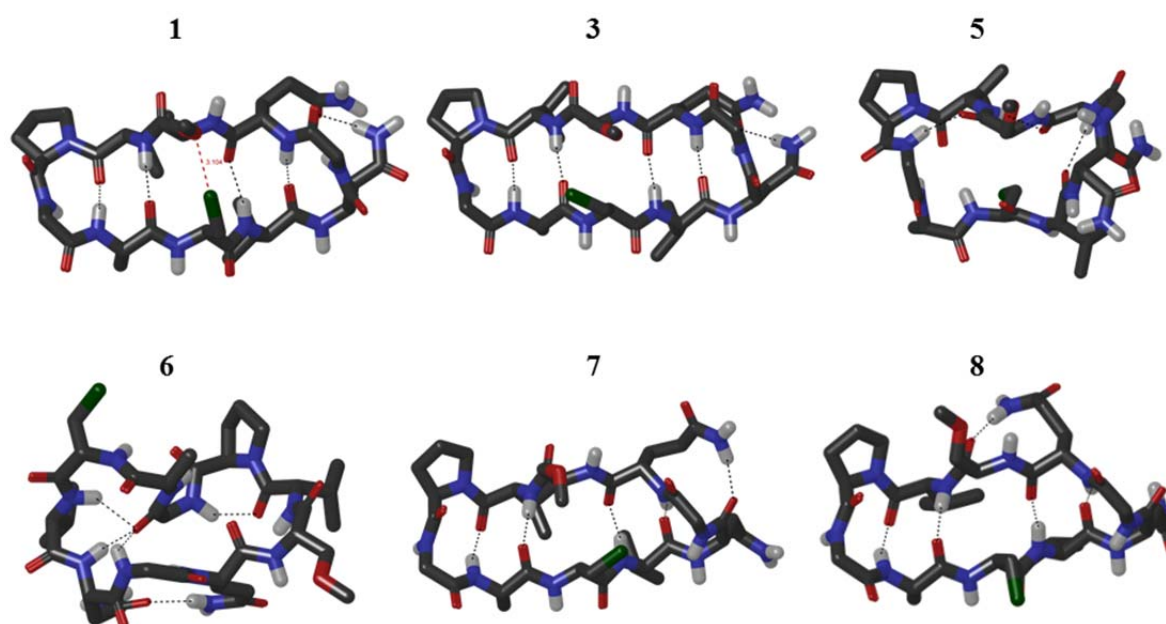

**Figure S11.** The most populated solution conformations of **5**, as selected by the NAMFIS-analysis. Populations in % are given in Table S21. Hydrogen bonds are indicated by black dotted lines. Non-polar hydrogens are omitted for clarity. Conformer 1 has a halogen bond interaction indicated by red dotted line, with a Cl $\cdots$ OMe distance of 3.104 Å and a C–Cl–O angle of 175.7°.

**NAMFIS ensemble analysis at the interaction-site.** In order to examine if the NMR-data could show the spatial orientation of the A(Cl) and S(Me) side chains, i.e. if a halogen bond interaction between these two residues occur, a NAMFIS analysis was run with constrains only concerning these residues. A hairpin conformation was selected and the C $\alpha$ —C $\beta$  bond was rotated, giving 9 different conformers (figure S12) which were used as input ensemble. The input distances are given in table S27.

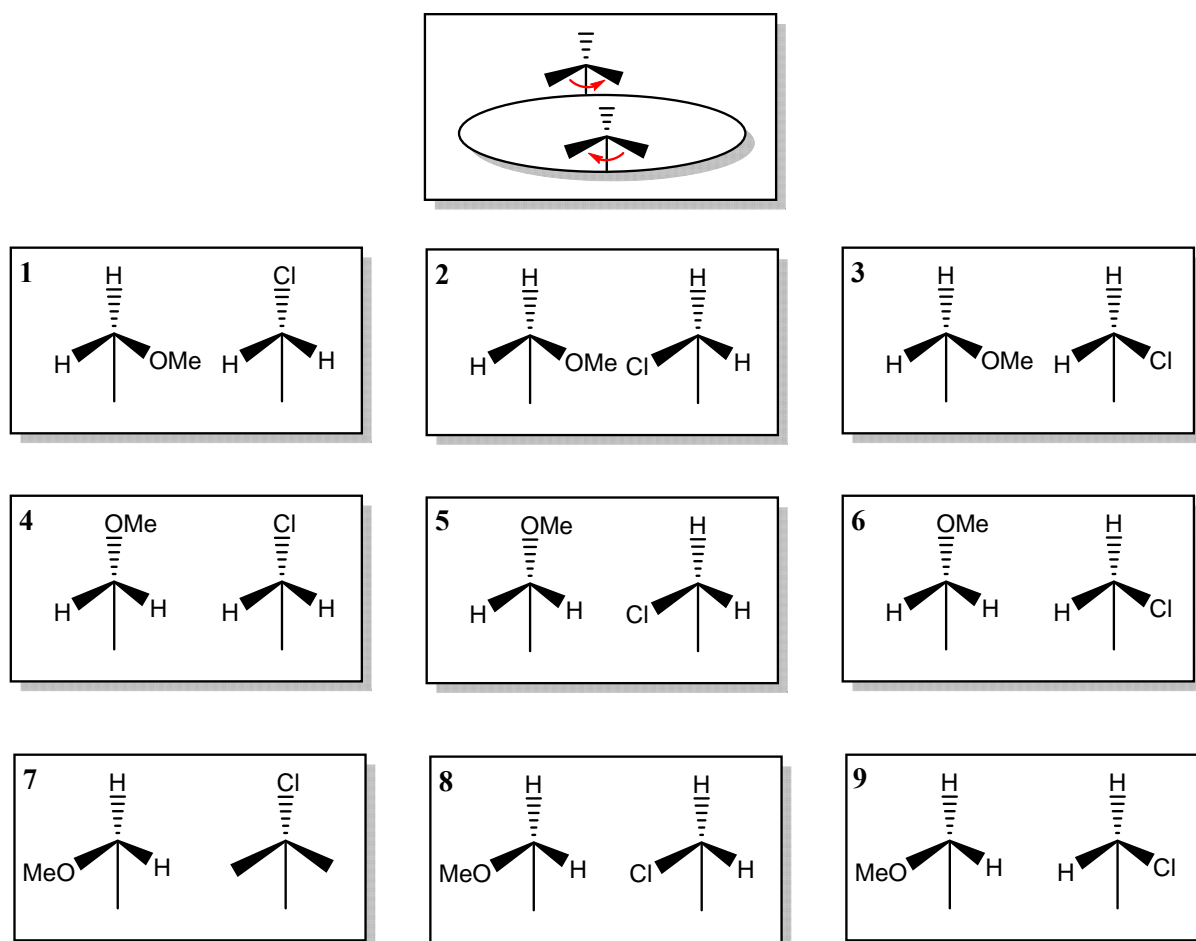

**Figure S12.** The input ensemble for the NAMFIS analyses for peptide **5** with the A(Cl)3 and S(Me)8 interactions as constraints. The ensemble was generated by rotating the  $C\alpha-C\beta$  bond, as indicated by the red arrows.

**Table S27.** Interproton distances (Å) for Peptide **5** concerning the A(Cl)3 and S(Me)8 residues derived from NOE build-up measurements.

| No.        | AA1         | AA2         | f2 ppm      | f1 ppm      | R2          | Dist. (Å)   |
|------------|-------------|-------------|-------------|-------------|-------------|-------------|
| 1          | G10NH       | A(Cl)3β1    | 8.18        | 3.70        | 0.99        | 3.36        |
| 2          | Q9NH        | A(Cl)3β1    | 7.57        | 3.70        | 0.99        | 3.56        |
| 3          | S(Me)8NH    | S(Me)8β2    | 7.57        | 3.44        | 0.99        | 2.13        |
| 4          | S(Me)8NH    | S(Me)8β1    | 7.57        | 3.55        | 0.99        | 2.37        |
| 5          | A(Cl)3NH    | A(Cl)3β1    | 8.75        | 3.70        | 0.99        | 2.48        |
| 6          | A(Cl)3NH    | A(Cl)3β2    | 8.75        | 3.48        | 0.99        | 2.32        |
| 7          | V2NH        | A(Cl)3β1    | 8.60        | 3.70        | 0.99        | 2.63        |
| 8          | V7NH        | S(Me)8β1    | 8.51        | 3.55        | 0.99        | 2.60        |
| 9          | A(Cl)3α     | A(Cl)3β1    | 5.25        | 3.70        | 0.99        | 2.19        |
| 10         | A(Cl)3α     | A(Cl)3β2    | 5.25        | 3.48        | 0.99        | 2.36        |
| 11         | S(Me)8α     | A(Cl)3β1    | 4.80        | 3.70        | 0.99        | 2.93        |
| 12         | S(Me)8α     | S(Me)8β2    | 4.80        | 3.44        | 0.98        | 2.16        |
| 13         | S(Me)8α     | S(Me)8β1    | 4.80        | 3.55        | 0.99        | 2.25        |
| 14         | S(Me)8NH    | S(Me)8δ     | 7.57        | 3.19        | 0.99        | 3.62        |
| 15         | V7NH        | S(Me)8δ     | 8.51        | 3.19        | 0.99        | 3.30        |
| 16         | S(Me)8α     | S(Me)8δ     | 4.80        | 3.19        | 0.99        | 2.95        |
| <i>ref</i> | <i>N1β1</i> | <i>N1β2</i> | <i>2.91</i> | <i>2.43</i> | <i>0.99</i> | <i>1.78</i> |

Since there are two possible β-protons on each residue (A(Cl)β1/β2 and S(Me)β1/β2), there are four possible ways to assign the NMR-data. NAMFIS analyses were run for all four combinations and the results are given in table S28 and S29.

**Table S28.** Result of the NAMFIS-analyses for peptide **5** with the A(Cl)3 and S(Me)8 interactions as constrains.

|          | Main conformer | Minor conformer | Msigma%   | RMSD distances |
|----------|----------------|-----------------|-----------|----------------|
| NAMFIS 1 | 1 (92%)        | 4 (8%)          | 0.163D+11 | 1.56           |
| NAMFIS 2 | 1 (92%)        | 4 (8%)          | 0.408D+08 | 1.07           |
| NAMFIS 3 | 1 (92%)        | 4 (8%)          | 0.284D+10 | 1.51           |
| NAMFIS 4 | 1 (92%)        | 4 (8%)          | 0.709D+07 | 1.01           |

**Table S29.** Experimentally determined and back-calculated (NAMFIS) interproton distances (Å) for the solution ensemble peptide **5** using the A(Cl)3 and S(Me)8 interactions as constrains.

| <b>Interproton distances</b> |              |              |              |              |
|------------------------------|--------------|--------------|--------------|--------------|
|                              | NAMFIS 1     | NAMFIS 2     | NAMFIS 3     | NAMFIS 4     |
| <u>Exp.</u>                  | <u>Calc.</u> | <u>Calc.</u> | <u>Calc.</u> | <u>Calc.</u> |
| 3.36                         | 7.66         | 5.97         | 7.66         | 5.97         |
| 3.56                         | 6.09         | 4.55         | 6.09         | 4.55         |
| 2.13                         | 3.62         | 3.62         | 2.55         | 2.55         |
| 2.37                         | 2.55         | 2.55         | 3.62         | 3.62         |
| 2.48                         | 2.74         | 3.66         | 2.74         | 3.66         |
| 2.32                         | 3.66         | 2.74         | 3.66         | 2.74         |
| 2.63                         | 4.37         | 3.26         | 4.37         | 3.26         |
| 2.60                         | 4.16         | 4.16         | 3.33         | 3.33         |
| 2.19                         | 3.01         | 2.74         | 3.01         | 2.74         |
| 2.36                         | 2.74         | 3.01         | 2.74         | 3.01         |
| 2.93                         | 4.46         | 4.39         | 4.46         | 4.39         |
| 2.16                         | 2.40         | 2.40         | 3.06         | 3.06         |
| 2.25                         | 3.06         | 3.06         | 2.40         | 2.40         |
| 3.62                         | 3.98         | 3.98         | 3.98         | 3.98         |
| 3.30                         | 3.15         | 3.15         | 3.14         | 3.14         |
| 2.95                         | 3.50         | 3.50         | 3.49         | 3.49         |
| <i>RMSD distances</i>        | <i>1.56</i>  | <i>1.07</i>  | <i>1.51</i>  | <i>1.01</i>  |

## 6. DFT-calculations

The geometry optimization of **5** was performed by a two-layer ONIOM<sup>12</sup> calculation where DFT employing Truhlar's M06 exchange and correlation functional<sup>13</sup> was used for the high-level part and the PM6<sup>14</sup> method for the low-level part. The high-level part was chosen to comprise the residues S(Me)8 and A(Cl)3, incorporating all atoms of the peptide bonds to V2, A4, V7, and Q9, respectively, as well as the  $\alpha$  C atoms of V2 and V2 and the H atoms bonded to them. The atoms at the cut between the two ONIOM layers were replaced by H in the high-level layer. For the treatment of the S(Me)8 $\cdots$ A(Cl)3 dimer and its two fragments, the vacant bonds were saturated by H atoms, whose positions were reoptimized with the remaining atoms kept fixed. To get the geometry of the S(Me)8 $\cdots$ A(H)3 dimer, the Cl atom in A(Cl)3 was replaced by an H atom, whose position was optimized again with the rest of the dimer kept rigid. For the DFT calculation, the triple-zeta version (pc-2) of Jensen's polarization consistent basis sets<sup>15-17</sup> was used. Diffuse functions<sup>18</sup> were added for the O and Cl atoms in the O $\cdots$ Cl bond as well as the nearest neighbors of these atoms and the H atom replacing the Cl in A(H)3. The basis-set superposition error was corrected by the Counterpoise method.<sup>19</sup> To avoid numerical problems that may arise when the M06 functional is applied for weakly bound complexes<sup>20</sup> a high-resolution integration grid was used for the DFT integrations (Gaussian keyword Grid=Ultrafine). Solvent effects were simulated by the Polarizable Continuum Model (PCM)<sup>21</sup> with dimethyl sulfoxide as solvent. For the optimization of the saturating H atoms in the S(Me)8 $\cdots$ A(H)3 dimer, the diffuse basis functions as well as the PCM were omitted for cost reasons. Also, the Counterpoise corrections had to be calculated for the gas phase. All calculations were done with the Gaussian09 program package.<sup>22</sup>

In the following, the equilibrium geometries and energies for the structure investigated in this work are given. For peptide **5**, the specification of the ONIOM layers is given in the Gaussian

input format, i.e. High and Low for the high-level and low-level layers, respectively, atoms that are replaced by a valence-saturating H atom in the high-level layer are marked by a H at the end of the line. For the two dimers, it is specified at the end of each line to which of the monomers they belong, the format corresponding to a Gaussian Counterpoise calculation. The geometries for the monomers are obtained by extracting the respective fragment from the dimer geometry (since no reoptimization is performed for the monomers).

Graphical representations av molecules and molecular surfaces were prepared with GaussView.<sup>23</sup>

```
-----
Me2...ClCH2 M06
Basis set:
  Cl, O, C ... aug-pc-2
  H      ... pc-2

O      -1.902096    0.000041   -0.546739
C      -2.046102    1.159192    0.228458
C      -2.047125   -1.158999    0.228428
H      -1.894042    2.020801   -0.418481
H      -1.306464    1.189559    1.037782
H      -3.046115    1.220084    0.674329
H      -1.897022   -2.020749   -0.418777
H      -3.046799   -1.218431    0.675252
H      -1.306759   -1.190587    1.037044
Cl     1.368847    0.000026   -0.187355
C      3.111966   -0.000267    0.221860
H      3.325838    0.889887    0.802660
H      3.678905    0.001851   -0.702238
H      3.326392   -0.892738    0.798900
```

E(RM06) = -655.097260318

```
-----
Peptide 5 ONIOM(M06:PM6)

C      7.166097   -1.591581   -1.685055   Low
C      5.825606   -2.176557   -2.134949   Low
O      5.629658   -2.418006   -3.325495   Low
H      7.901708   -2.436055   -1.612323   Low
H      7.547733   -0.929757   -2.507853   Low
N      4.886898   -2.509708   -1.175209   Low
C      3.606819   -3.155108   -1.551521   Low   H
C      2.463219   -2.131076   -1.329388   High
O      2.707997   -0.997939   -0.968078   High
C      3.403254   -4.404489   -0.699770   Low
H      4.961923   -2.189211   -0.200312   Low
H      3.643909   -3.430712   -2.647519   Low
H      3.189937   -4.177591    0.353657   Low
H      2.586306   -5.035688   -1.075094   Low
H      4.302834   -5.040639   -0.706546   Low
N      1.234393   -2.607466   -1.571538   High
C      0.039144   -1.892708   -1.186408   High
C     -0.881292   -2.859545   -0.440486   High
O     -0.955490   -4.025489   -0.780174   High
C     -0.744768   -1.379984   -2.378718   High
Cl     0.133585   -0.067304   -3.225209   High
H      1.106444   -3.581851   -1.808514   High
H      0.317420   -1.053776   -0.548067   High
```

|   |           |           |           |      |   |
|---|-----------|-----------|-----------|------|---|
| H | -0.915129 | -2.173253 | -3.103381 | High |   |
| H | -1.707034 | -0.970455 | -2.064404 | High |   |
| N | -1.600219 | -2.288047 | 0.541822  | High |   |
| C | -2.663521 | -2.981512 | 1.240058  | High |   |
| C | -3.918582 | -2.131733 | 0.996962  | Low  | H |
| O | -4.062652 | -1.019410 | 1.489070  | Low  |   |
| C | -2.396854 | -3.167284 | 2.754393  | Low  | H |
| C | -1.389200 | -4.299746 | 2.967847  | Low  |   |
| C | -1.926751 | -1.881633 | 3.435513  | Low  |   |
| H | -1.450867 | -1.300053 | 0.727347  | High |   |
| H | -2.751188 | -3.973394 | 0.761942  | High |   |
| H | -3.373547 | -3.474368 | 3.216378  | Low  |   |
| H | -1.188780 | -4.451350 | 4.036236  | Low  |   |
| H | -1.753261 | -5.255080 | 2.572143  | Low  |   |
| H | -0.425477 | -4.089342 | 2.489156  | Low  |   |
| H | -1.930277 | -1.991655 | 4.526726  | Low  |   |
| H | -0.905422 | -1.606761 | 3.148116  | Low  |   |
| H | -2.581878 | -1.033212 | 3.190845  | Low  |   |
| N | -4.891829 | -2.681788 | 0.153132  | Low  |   |
| C | -5.857601 | -1.798285 | -0.546781 | Low  |   |
| C | -5.026163 | -0.895162 | -1.497004 | Low  |   |
| O | -3.828299 | -1.125008 | -1.696727 | Low  |   |
| C | -6.674787 | -0.998404 | 0.474892  | Low  |   |
| C | -7.922420 | -0.378370 | -0.099420 | Low  |   |
| O | -8.334375 | -0.624403 | -1.239161 | Low  |   |
| N | -8.613665 | 0.485926  | 0.719126  | Low  |   |
| H | -4.730975 | -3.587916 | -0.297945 | Low  |   |
| H | -6.547144 | -2.436468 | -1.173047 | Low  |   |
| H | -6.957325 | -1.669971 | 1.323675  | Low  |   |
| H | -6.031559 | -0.221856 | 0.976652  | Low  |   |
| H | -9.431171 | 0.975735  | 0.375664  | Low  |   |
| H | -8.205722 | 0.852973  | 1.580928  | Low  |   |
| N | -5.616596 | 0.207240  | -2.077449 | Low  |   |
| C | -4.785068 | 1.189476  | -2.796239 | Low  |   |
| C | -4.075926 | 2.144737  | -1.821941 | Low  |   |
| O | -4.225788 | 3.361524  | -1.881408 | Low  |   |
| H | -6.626977 | 0.383662  | -2.045380 | Low  |   |
| H | -4.021544 | 0.679447  | -3.439346 | Low  |   |
| H | -5.423660 | 1.789996  | -3.490740 | Low  |   |
| N | -3.231478 | 1.560233  | -0.893217 | Low  |   |
| C | -2.550039 | 2.332000  | 0.169761  | Low  | H |
| C | -1.099691 | 1.778800  | 0.194444  | High |   |
| O | -0.860241 | 0.631144  | 0.523006  | High |   |
| C | -3.188152 | 2.109605  | 1.555079  | Low  |   |
| C | -4.322510 | 3.085440  | 1.867259  | Low  |   |
| C | -5.664413 | 2.592452  | 1.375041  | Low  |   |
| O | -6.317152 | 1.717616  | 1.955052  | Low  |   |
| N | -6.195681 | 3.191401  | 0.251939  | Low  |   |
| H | -3.128992 | 0.533264  | -0.829720 | Low  |   |
| H | -2.583586 | 3.427551  | -0.090823 | Low  |   |
| H | -3.538258 | 1.053546  | 1.654944  | Low  |   |
| H | -2.405111 | 2.217768  | 2.338406  | Low  |   |
| H | -4.395366 | 3.220995  | 2.973161  | Low  |   |
| H | -4.087561 | 4.103158  | 1.486776  | Low  |   |
| H | -7.084126 | 2.888256  | -0.126036 | Low  |   |
| H | -5.674739 | 3.848339  | -0.323058 | Low  |   |
| N | -0.166147 | 2.650628  | -0.188950 | High |   |
| C | 1.217008  | 2.241030  | -0.316691 | High |   |
| C | 1.864906  | 2.029882  | 1.054886  | High |   |
| O | 1.724159  | 2.840298  | 1.949042  | High |   |
| C | 1.998912  | 3.319268  | -1.034296 | High |   |
| O | 1.447470  | 3.514539  | -2.303999 | High |   |
| C | 2.109955  | 4.534317  | -3.010562 | High |   |



|   |           |           |           |      |   |
|---|-----------|-----------|-----------|------|---|
| H | -0.428318 | 3.577629  | -0.484168 | High |   |
| H | 1.257473  | 1.317030  | -0.904047 | High |   |
| H | 1.966625  | 4.250729  | -0.448570 | High |   |
| H | 3.050730  | 3.010356  | -1.104873 | High |   |
| H | 1.628607  | 4.635693  | -3.980344 | High |   |
| H | 2.047382  | 5.489958  | -2.478986 | High |   |
| H | 3.167019  | 4.290315  | -3.160883 | High |   |
| N | 2.647653  | 0.934563  | 1.118704  | High |   |
| C | 3.433024  | 0.583540  | 2.279850  | High |   |
| C | 4.848511  | 0.255372  | 1.783559  | Low  | H |
| O | 5.256853  | -0.894489 | 1.600921  | Low  |   |
| C | 2.843358  | -0.596781 | 3.097134  | Low  | H |
| C | 1.665719  | -0.102268 | 3.940863  | Low  |   |
| C | 2.429775  | -1.778775 | 2.219338  | Low  |   |
| H | 2.601288  | 0.263166  | 0.357313  | High |   |
| H | 3.457957  | 1.478643  | 2.931460  | High |   |
| H | 3.654822  | -0.943555 | 3.791575  | Low  |   |
| H | 1.218840  | -0.924692 | 4.513857  | Low  |   |
| H | 1.971491  | 0.661834  | 4.665305  | Low  |   |
| H | 0.869375  | 0.330910  | 3.324133  | Low  |   |
| H | 3.238772  | -2.059941 | 1.530844  | Low  |   |
| H | 2.197479  | -2.659123 | 2.831128  | Low  |   |
| H | 1.538536  | -1.562079 | 1.621607  | Low  |   |
| N | 5.683153  | 1.321356  | 1.498376  | Low  |   |
| C | 7.089643  | 1.132974  | 1.043409  | Low  |   |
| C | 7.090728  | 0.530071  | -0.382515 | Low  |   |
| O | 7.092185  | 1.200622  | -1.408230 | Low  |   |
| C | 5.361306  | 2.768153  | 1.692839  | Low  |   |
| C | 7.734199  | 2.533099  | 1.057203  | Low  |   |
| C | 6.716202  | 3.491176  | 1.698399  | Low  |   |
| H | 4.713063  | 3.119038  | 0.860780  | Low  |   |
| H | 4.805755  | 2.921772  | 2.643910  | Low  |   |
| H | 7.623078  | 0.444161  | 1.753316  | Low  |   |
| H | 8.685626  | 2.522331  | 1.619860  | Low  |   |
| H | 7.990867  | 2.864666  | 0.030413  | Low  |   |
| H | 6.661732  | 4.447430  | 1.146507  | Low  |   |
| H | 7.019690  | 3.752736  | 2.730135  | Low  |   |
| N | 7.143433  | -0.854571 | -0.416560 | Low  |   |
| H | 7.017729  | -1.407805 | 0.441925  | Low  |   |

Small system: E(RPM6) = -0.359438869264  
Small system: E(RM06) = -1487.031484837557  
Big system: E(RPM6) = -1.055915343918  
Total: E(ONIOM) = -1487.727961312211

-----  
S(Me)8...A(Cl)3 extracted from peptide 5 M06  
Fragment 1: A(Cl)3  
Fragment 2: S(Me)8

|    |           |           |           |   |
|----|-----------|-----------|-----------|---|
| C  | -1.335016 | -0.343293 | 2.704164  | 1 |
| O  | -0.214059 | 0.006762  | 2.395286  | 1 |
| N  | -2.274641 | -0.748966 | 1.839248  | 1 |
| C  | -2.136662 | -0.575464 | 0.411394  | 1 |
| C  | -3.420834 | 0.059812  | -0.123128 | 1 |
| O  | -4.500625 | -0.242193 | 0.349287  | 1 |
| C  | -1.964752 | -1.890641 | -0.323222 | 1 |
| Cl | -0.381198 | -2.644644 | 0.044317  | 1 |
| H  | -3.206148 | -0.964493 | 2.167578  | 1 |
| H  | -1.276994 | 0.065169  | 0.213137  | 1 |
| H  | -2.735264 | -2.602110 | -0.034162 | 1 |
| H  | -2.004571 | -1.740332 | -1.404085 | 1 |
| N  | -3.230882 | 0.899634  | -1.156061 | 1 |

|   |           |           |           |   |
|---|-----------|-----------|-----------|---|
| C | -4.325179 | 1.456151  | -1.925348 | 1 |
| H | -2.276739 | 1.067918  | -1.462865 | 1 |
| H | -5.248655 | 1.008163  | -1.517157 | 1 |
| C | 0.680823  | 0.477885  | -2.352005 | 2 |
| O | -0.270741 | 0.881991  | -1.708831 | 2 |
| N | 1.873747  | 0.206979  | -1.820861 | 2 |
| C | 2.083529  | 0.304503  | -0.391263 | 2 |
| C | 2.122703  | 1.765005  | 0.068124  | 2 |
| O | 2.773311  | 2.596709  | -0.532779 | 2 |
| C | 3.410188  | -0.327315 | -0.031190 | 2 |
| O | 3.393845  | -1.672040 | -0.413050 | 2 |
| C | 4.617113  | -2.308831 | -0.137030 | 2 |
| H | 2.614423  | -0.159385 | -2.397402 | 2 |
| H | 1.278446  | -0.234723 | 0.120042  | 2 |
| H | 4.225426  | 0.211342  | -0.538119 | 2 |
| H | 3.571424  | -0.226964 | 1.050775  | 2 |
| H | 4.536134  | -3.343151 | -0.462710 | 2 |
| H | 5.443399  | -1.829229 | -0.672724 | 2 |
| H | 4.841489  | -2.288961 | 0.934776  | 2 |
| N | 1.454009  | 1.986972  | 1.217062  | 2 |
| C | 1.430209  | 3.265378  | 1.890376  | 2 |
| H | 0.847356  | 1.253013  | 1.571979  | 2 |
| H | 2.234657  | 3.878958  | 1.440014  | 2 |
| H | -1.668369 | -0.393454 | 3.754318  | 1 |
| H | -4.230494 | 1.200559  | -2.979701 | 1 |
| H | -4.378193 | 2.539450  | -1.822236 | 1 |
| H | 0.635183  | 0.313158  | -3.441432 | 2 |
| H | 1.616569  | 3.141102  | 2.955851  | 2 |
| H | 0.479082  | 3.781592  | 1.750478  | 2 |

E(dimer) = -1487.04008164  
E(fragment 1) = -916.063500025  
E(fragment 2) = -570.959669447  
Counterpoise: BSSE energy = 0.001204181534

-----  
S(Me)8···A(H)3 extracted from peptide 5 M06  
(Cl in A(Cl)3 replaced by H)  
Fragment 1: S(Me)8  
Fragment 2: A(H)3

|   |           |           |           |   |
|---|-----------|-----------|-----------|---|
| C | -1.356886 | -0.094657 | 2.783674  | 1 |
| O | -0.243035 | 0.208546  | 2.406987  | 1 |
| N | -2.288843 | -0.680931 | 2.019943  | 1 |
| C | -2.154829 | -0.790472 | 0.585387  | 1 |
| C | -3.451265 | -0.297725 | -0.058693 | 1 |
| O | -4.524820 | -0.520737 | 0.468637  | 1 |
| C | -1.957815 | -2.221409 | 0.124401  | 1 |
| H | -3.215873 | -0.844863 | 2.388316  | 1 |
| H | -1.307793 | -0.185545 | 0.260828  | 1 |
| H | -2.714304 | -2.876133 | 0.551593  | 1 |
| H | -2.000975 | -2.288460 | -0.964674 | 1 |
| N | -3.278014 | 0.324822  | -1.237995 | 1 |
| C | -4.383183 | 0.697564  | -2.097450 | 1 |
| H | -2.327429 | 0.447133  | -1.576028 | 1 |
| H | -5.297655 | 0.321733  | -1.604892 | 1 |
| C | 0.640628  | -0.251046 | -2.343535 | 2 |
| O | -0.318311 | 0.254166  | -1.788876 | 2 |
| N | 1.838785  | -0.389066 | -1.774376 | 2 |
| C | 2.047226  | -0.006984 | -0.393132 | 2 |
| C | 2.058333  | 1.515975  | -0.231552 | 2 |
| O | 2.692488  | 2.224646  | -0.987687 | 2 |
| C | 3.386003  | -0.530017 | 0.079078  | 2 |

|   |           |           |           |   |
|---|-----------|-----------|-----------|---|
| O | 3.395515  | -1.923752 | -0.029477 | 2 |
| C | 4.630983  | -2.470222 | 0.361757  | 2 |
| H | 2.586172  | -0.848099 | -2.270283 | 2 |
| H | 1.252931  | -0.449623 | 0.218033  | 2 |
| H | 4.190464  | -0.086880 | -0.527728 | 2 |
| H | 3.545710  | -0.214786 | 1.119192  | 2 |
| H | 4.569890  | -3.549847 | 0.247214  | 2 |
| H | 5.447619  | -2.090440 | -0.261625 | 2 |
| H | 4.855370  | -2.234685 | 1.407549  | 2 |
| N | 1.385941  | 1.947970  | 0.853689  | 2 |
| C | 1.337695  | 3.333549  | 1.261222  | 2 |
| H | 0.793741  | 1.287313  | 1.349190  | 2 |
| H | 2.129942  | 3.861094  | 0.695109  | 2 |
| H | -1.688778 | 0.057434  | 3.824433  | 1 |
| H | -4.284004 | 0.240471  | -3.080904 | 1 |
| H | -4.457097 | 1.778677  | -2.210197 | 1 |
| H | 0.597737  | -0.628664 | -3.378732 | 2 |
| H | 1.526859  | 3.425840  | 2.329450  | 2 |
| H | 0.376705  | 3.793883  | 1.026101  | 2 |
| H | -0.980340 | -2.585411 | 0.445625  | 1 |

E(dimer) = -1027.43061020  
 E(fragment 1) = -456.456445015  
 E(fragment 2) = -570.959669452  
 Counterpoise: BSSE energy = 0.001107246925

## 7. References

- (1) Danelius, E.; Brath, U.; Erdélyi, M. *Synlett* **2013**, *24*, 2407.
- (2) Andersson, H.; Danelius, E.; Jarvoll, P.; Niebling, S.; Hughes, A. J.; Westenhoff, S.; Brath, U.; Erdélyi, M. *ACS Omega* **2017**, *2*, 508.
- (3) Carpino, L. A.; Han, G. Y. *J. Org. Chem.* **1972**, *37*, 3404.
- (4) Malesevic, M.; Strijowski, U.; Bächle, D.; Sewald, N. *Journal of Biotechnology* **2004**, *112*, 73.
- (5) Wang, Y.; Xin, X.; Liang, Y.; Lin, Y.; Zhang, R.; Dong, D. *Eur. J. Org. Chem.* **2009**, *24*, 4165.
- (6) Erdelyi, M.; Langer, V.; Karlen, A.; Gogoll, A. *New J. Chem.* **2002**, *26*, 834.
- (7) Hoffman, R. E.; Becker, E. D. *J. Magn. Reson.* **2005**, *176*, 87.
- (8) Harder, E.; Damm, W.; Maple, J.; Wu, C.; Reboul, M.; Xiang, J. Y.; Wang, L.; Lupyan, D.; Dahlgren, M. K.; Knight, J. L.; Kaus, J. W.; Cerutti, D. S.; Krilov, G.; Jorgensen, W. L.; Abel, R.; Friesner, R. A. *J. Chem. Theory Comput.* **2016**, *12*, 281.
- (9) Cicero, D. O.; Barbato, G.; Bazzo, R. *J. Am. Chem. Soc.* **1995**, *117*, 1027.
- (10) Kessler, H.; Griesinger, C.; Lautz, J.; Mueller, A.; Van Gunsteren, W. F.; Berendsen, H. J. C. *J. Am. Chem. Soc.* **1988**, *110*, 3393.
- (11) Schmidt, J. M. *J. Magn. Reson.* **2007**, *186*, 34.
- (12) Dapprich, S.; Komáromi, I.; Byun, K. S.; Morokuma, K.; Frisch, M. J. *Journal of Molecular Structure: THEOCHEM* **1999**, *461*, 1.
- (13) Zhao, Y.; Truhlar, D. G. *Theor. Chem. Acc.* **2008**, *120*, 215.
- (14) Stewart, J. J. P. *J. Mol. Model.* **2007**, *13*, 1173.

- (15) Jensen, F. *J. Chem. Phys.* **2001**, *115*, 9113.
- (16) Jensen, F. *J. Chem. Phys.* **2002**, *116*, 7372.
- (17) Jensen, F.; Helgaker, T. *J. Chem. Phys.* **2004**, *121*, 3463.
- (18) Jensen, F. *J. Chem. Phys.* **2002**, *117*, 9234.
- (19) Boys, S. F.; Bernardi, F. *Molecular Physics* **1970**, *19*, 553.
- (20) Gräfenstein, J.; Cremer, D. *J. Chem. Phys.* **2007**, *127*, 164113.
- (21) Tomasi, J.; Mennucci, B.; Cammi, R. *Chem. Rev.* **2005**, *105*, 2999.
- (22) Frisch, M. J.; Trucks, G. W.; Schlegel, H. B.; Scuseria, G. E.; Robb, M. A.; Cheeseman, J. R.; Scalmani, G.; Barone, V.; Mennucci, B.; Petersson, G. A.; Nakatsuji, H.; Caricato, M.; Li, X.; Hratchian, H. P.; Izmaylov, A. F.; Bloino, J.; Zheng, G.; Sonnenberg, J. L.; Hada, M.; Ehara, M.; Toyota, K.; Fukuda, R.; Hasegawa, J.; Ishida, M.; Nakajima, T.; Honda, Y.; Kitao, O.; Nakai, H.; Vreven, T.; Montgomery, J. A.; Peralta, J. E.; Ogliaro, F.; Bearpark, M.; Heyd, J. J.; Brothers, E.; Kudin, K. N.; Staroverov, V. N.; Kobayashi, R.; Normand, J.; Raghavachari, K.; Rendell, A.; Burant, J. C.; Iyengar, S. S.; Tomasi, J.; Cossi, M.; Rega, N.; Millam, J. M.; Klene, M.; Knox, J. E.; Cross, J. B.; Bakken, V.; Adamo, C.; Jaramillo, J.; Gomperts, R.; Stratmann, R. E.; Yazyev, O.; Austin, A. J.; Cammi, R.; Pomelli, C.; Ochterski, J. W.; Martin, R. L.; Morokuma, K.; Zakrzewski, V. G.; Voth, G. A.; Salvador, P.; Dannenberg, J. J.; Dapprich, S.; Daniels, A. D.; Farkas, Ö.; Foresman, J. B.; Ortiz, J. V.; Cioslowski, J.; Fox, D. J. Gaussian, Inc., Wallingford CT, 2009.
- (23) Dennington, R.; Keith, T.; Millam, J. GaussView, Version 5.0.9, Semichem Inc., Shawnee Mission KS, 2009.
